# Supplementary material for: More Homogeneous Wind Conditions Under Strong Climate Change Decrease the Potential for Inter-State Balancing of Electricity in Europe
Source: Copernicus journal article supplement (doi:10.5194/esd-2017-48), 2017-05-24
Supplement: Supplementary file [file esd-2017-48-AC1-supplement.pdf]

# Final author comments: More Homogeneous Wind Conditions Under Strong Climate Change Decrease the Potential for Inter-State Balancing of Electricity in Europe

esd-2017-48

Jan Wohland et al.

August 31, 2017

1 Throughout this manuscript red denotes deletions from the original manuscript and green  
2 denotes additions to the text.

## 3 **Reviewer 1**

4 We thank the reviewer for his/her helpful comments to improve the manuscript. The points of  
5 criticism were clearly formulated and mostly straightforward to implement. We are confident  
6 that the modifications helped enhance the readability and avoid misinterpretations.

## 7 **Minor Point 1**

8 The captions of tables and figures are very long and include details on methods and even on  
9 findings. I found it useful actually, but captions should describe the figure or table, nothing  
10 more and nothing less. Maybe consult with the journal editors for guidance. You can easily  
11 move some of the caption text into the main text.

## 12 **Author's response**

13 This aspect has been repeatedly mentioned by both reviewers (see Reviewer 2, Minor Points 7,8).  
14 We hence decide to shorten captions where possible and move interpretations and discussion to  
15 the main text.

## 16 **Changes in the manuscript**

### 17 **Caption of Fig. 1, p. 8:**

#### 18 **Approach of the study.**

19 a) Wind fields from high-resolution climate models and the 2010/2011 Net Transfer Ca-  
20 pacities are used as input to the model. b) The wind speeds are first translated into  
21 generation of individual wind parks using local wind fields . In a second step the gen-  
22 eration is and then aggregated to a national level for each country. c) In combination  
23 with country-specific load data, the nodal mismatch for every country and timestep is  
24 computed. If generation exceeds the load (green area), countries can export energy until  
25 lines reach their transmission capacity. Remaining energy has to be curtailed (dumped).

If generation is lower than load, electricity is imported. If importing is not an option due to transmission limits or lack of available excess energy in other countries, backup energy has to be provided by dispatchable power plants (e.g. gas turbines or other thermoelectric plants). **d) We assume a controllable European power transmission grid.** A minimization of the total backup energy of all countries then yields a flow pattern in Europe. **In the shown case, strong winds over the North Sea lead to high generation in this region while there is little generation in the southern part of Europe. Energy is hence mainly transported from the North Sea region to Southern Europe and the high transmission needs lead to an operation of almost all lines at their maximum.**

**Caption of Table 1, p.9**

see Reviewer 2, Minor Point 6

**Caption of Fig. 2, p. 11:**

**The impact of climate change on backup energy under different grid expansion scenarios.** Different realizations of the European inter-state grid expansion are given by the grid expansion coefficient  $\alpha$ . While  $\alpha = 0$  denotes the isolated case without inter-country transmission network,  $\alpha = 1$  reproduces the configuration as of today and  $\alpha = \infty$  represents unlimited European transmission. Different markers refer to distinct 20 year time periods (see Table 1), colors denote different climate models. **a) Backup energy as a function of grid expansion expressed in units of the total European load  $D_{\text{tot}} = \int \sum_i D_i(t) dt$ . b) Absolute change of backup energy by the end of the century. c) Relative change of backup energy by the end of the century.**

**a) Backup energy decreases monotonously with grid expansion. Without any grid, approximately 45 % of the wind-energy is produced at the wrong time and thus has to be curtailed and backed up later on. This number can be theoretically reduced to roughly 27% by grid extension.**

**b) All models report an increase of backup energy at the end of the century. This increase is approximately independent of the grid expansion for 3/5 models. For the other two models the increase is even more pronounced for a strongly interconnected grid (large  $\alpha$ ).**

**c) The relative change of backup energy features a steeper increase with grid expansion as compared to b. Highly connected systems can suffer from an increase of backup needs of up to 7%.**

The information taken from the caption is added in lines 180-185, page 10:

... with a factor  $\alpha$ . Without any grid, approximately 45 % of the wind-energy is produced at the wrong time and thus has to be curtailed and backed up later on. A strong grid extension ( $\alpha \gg 1$ ) clearly reduces **total balancing needs** backup energy to about 27% (cf. Fig. 2a). However, all models report an increase of backup energy at the end of the century. The **the** effect of climate change is almost independent of a grid extension: The absolute increase of backup energy until end of century is largely independent of the expansion coefficient  $\alpha$  for three out of five models (cf. Fig. 2b). Hence, the relative increase of backup needs paradoxically becomes even more pronounced for a strongly interconnected Europe (cf. Fig. 2c) Highly connected systems can suffer from an increase of backup needs of up to 7%.. There is considerable...

**Caption of Fig. 4, p. 17:**

**Correlation changes of wind timeseries averaged over all models (difference between end of century and reference correlations). An increase of spatial correlation over most of Europe is found which hints to more homogeneous wind conditions.**

72 This increase is most pronounced in the Central European region. However, at the mar-  
73 gins of the continent correlation decreases are found. A more detailed assessment, which  
74 in particular addresses inter-model spread, is shown in Fig. 5.

75 **Caption of Fig. 6, p. 21:**

76 **Backup energy and change of occurrence as a function of the  $f$ -parameter. a)**  
77 **Monotonous decrease of backup energy with increasing  $f$ -parameter** Backup energy versus  
78  $f$ -parameter for the entire domain. Circles denote the mean over the three considered  
79 periods for each model and errorbars indicate the standard deviation thereof. **b) The**  
80 **same decline is found if only Germany plus its neighbor countries are considered.** Same  
81 as a) but restricted to Germany and its neighbors **c) Change of occurrence of different**  
82  $f$ -parameters. The change of occurrence is computed as the difference between end of  
83 century and the reference period and is given in units of the total number of timesteps  
84  $N_{\text{tot}}$ . **Low  $f$ -parameters become more frequent by the end of the century while medium**  
85 **to high  $f$ -parameters occur less often. There is considerable inter-model spread, however**  
86 **16/22 agree on an increase in frequency of very low pressure events ( $f < 5$ ) and 17/22**  
87 **agree on a decrease of medium pressure events ( $10 \leq f < 15$ ).** Red diamonds denote the  
88 ensemble mean, red lines the ensemble median and hatched boxes indicate the 33rd to  
89 67th percentile. If a box lies completely above/below zero, the sign of the change can be  
90 considered as likely (Mastrandrea et al., 2010).

91 **Caption of Fig. 7, p. 22:**

92 **Changes of relative occurrence of primary CWTs with low  $f$ -parameters ( $f \leq$**   
93  **$5hPa/1000km$ ).** Changes are differences in occurrence between end of century and the  
94 reference period and are given in units of the total number of timesteps  $N_{\text{tot}}$ . Boxes  
95 indicate the 33rd to 67th percentile and are only shown if changes are substantial. **A**  
96 **majority of models projects more weak anticyclones while cyclonic CWTs occur less often**  
97 **(both findings are likely). In total, most models project an overall increase of the occurrence**  
98 **of CWTs with low  $f$ -parameters. This increase is dominantly rooted in more frequent**  
99 **anticyclonic CWTs.** Red diamonds denote the ensemble mean and red lines denote the  
100 ensemble median.

101 **Minor Point 2**

102 The abstract tends to over-emphasize the results without actual quantifications, which could  
103 be misinterpreted and used against wind energy if taken out of context. For example, rephrase  
104 as this: ... we find a robust but modest increase (up to 7%) of backup needs... and ... resulting  
105 in parallel generation shortfalls of up to XX MW (corresponding to YY% of power demand) in  
106 up to ZZ% of the countries.

107 **Author's response**

108 We thank the reviewer for his/her comment to this very important section of the paper and  
109 propose to include his comments as given below.

110 **Changes in the manuscript**

111 Following a high emission pathway (RCP8.5), we find a robust but modest increase (up  
112 to 7%) of backup needs in Europe until the end of the 21st century. The absolute increase  
113 of the backup needs is almost independent of potential grid expansion, leading to the  
114 paradoxical effect that relative impacts of climate change increase in a highly intercon-  
115 nected European system. The increase is rooted in more homogeneous wind conditions  
116 over Europe resulting in extensive parallel intensified simultaneous generation shortfalls.  
117 Individual country contributions to European generation shortfall increase by up to 9  
118 TWh/y, reflecting an increase of up to 4%. Our results are strengthened by comparison  
119 with a large CMIP5 ensemble using an approach based on Circulation Weather Types.

120 **Minor Point 3**

121 Line 110: please explain how the extrapolation to 80 m was done. Log law? Power law?  
122 Interpolation of model levels?

123 **Author's response**

124 When writing the manuscript, we decided to give this information in the supplement in an  
125 attempt to keep the manuscript concise. The Supplementary Material, A) Detailed Methodology  
126 states:

127 "Adopting the approach of Tobin et al. (2016), we use near-surface wind speeds 10 meters  
128 above the ground. Assuming a power-law relationship for the vertical wind profile, the velocity  
129 at hub height  $H$  is obtained as

$$v_H = v_{10\text{m}} \cdot \left(\frac{H}{10}\right)^{\frac{1}{7}} \quad (1)$$

130 and we chose  $H = 80\text{m}$ ."

131 However, since there are multiple ways to perform the vertical scaling, we agree that it is  
132 important to modify the main text such that it includes the words 'power law'.

133 **Changes in the manuscript**

134 See Reviewer 1, Minor Point 4 as this deals with the same sentence.

135 **Minor Point 4**

136 Line 111: which standard power curve was used? How were wake losses accounted for?

137 **Author's response**

138 Similar to the previous point, we thought that the specifics of the calculation are ideally given  
139 in the Supplement. The Supplementary Material, A) Detailed Methodology states:

”The conversion of wind speeds into renewable generation is performed using a simple power curve

$$P(v_H) = P_0 \begin{cases} 0, & \text{if } v_H < v_i \text{ or } v_H > v_0 \\ \frac{v_H^3 - v_I^3}{v_R^3 - v_I^3}, & \text{if } v_I \leq v_H < v_R \\ 1, & \text{if } v_R \leq v_H < v_0 \end{cases} \quad (2)$$

140 where  $v_H$  denotes wind velocity at hub height and  $v_I = 3.5$  m/s,  $v_R = 12$  m/s,  $v_0 = 25$  m/s  
141 denote the cut-in, rated and cut-out velocity of the wind turbine, respectively.”

142 Wake losses are not accounted for despite the fact that they reduce wind park yields. We  
143 argue that our findings are not severely impacted by this simplification. This is mainly because  
144 we focus on changes in wind generation and ignore wake losses both in the reference period and  
145 in future periods. While wake losses are likely to change absolute results, it seems plausible  
146 that they would impact system operation in the same way under current and future climate  
147 conditions. Moreover, it is -to our knowledge- still state-of-the-art either to neglect wake losses  
148 (e.g., Andresen et al., 2015) or to apply a bias-correction with measured generation data (e.g.,  
149 Staffell and Pfenninger, 2016; Gonzalez Aparcio et al., 2016). In addition to wake losses, the  
150 bias-correction combines a large number of effects (e.g. unresolved orography, low temporal  
151 sampling, local wind phenomena, siting of wind parks, model errors). We are not aware of any  
152 reason that this aggregate of effects has to remain constant in time. For a long-term climate  
153 change study we thus argue that no bias-correction does less harm than a potentially wrong bias  
154 correction. However, it is desirable to develop a process-based representation of wake effects for  
155 future research. This would require to combine regional climate models and electricity system  
156 models rather than feeding the output of climate models into electricity models.

157 We agree with the reviewer that (a) information about the power curve should be already  
158 given in the methods section and (b) a clear statement that wake losses are neglected should  
159 be included.

160 **Changes in the manuscript**

161 Near-surface wind speeds are scaled up to hub height (80 m) based on a power law and a  
162 standard power curve is used to obtain the power generation of the wind turbines, both  
163 as in Tobin et al. (2016) (see also Supplementary Material A). The power curve assumes  
164 a cut-in velocity of 3.5 m/s, a rated velocity of 12 m/s and a cut-out velocity of 25 m/s.  
165 Wake losses are not accounted for. The country-wise aggregated ...

166 **Minor Point 5**

167 Line 113: Why were the wind farms sized at 100 MW?

168 **Author's response**

169 In principle, we follow the partially random allocation approach of Monforti et al. (2016). They  
170 argue that "the spatial allocation of future wind turbines (...) is difficult to forecast, as the  
171 localization process is dependent on social as well as economic and practical aspects, and are thus  
172 generally difficult to investigate." However, they find that "the actual deployment of national  
173 wind turbine fleets in 2020 in a country is expected to have a little overall influence on the main  
174 features of the national wind power profiles".

175 The approach necessitates to define the power of a wind park unit. While Monforti et al.  
176 (2016) used wind parks of 20 MW, we decided to use 100 MW. The main reason for this choice  
177 is that we consider a scenario where 100% of electricity is generated from wind turbines (on  
178 average), while Monforti et al. (2016) use the EU 2020 plans that lead to 10% generation from  
179 wind turbines. That is, we use five times larger parks to produce ten times the amount of  
180 electricity thus leading to more 100 MW wind parks in our assessment than 20 MW wind parks  
181 in their assessment. We are hence confident that errors arising from the discretization of wind  
182 parks in our assessment are smaller than in Monforti et al. (2016).

183 Moreover, turbine capacity has increased substantially while wind turbines matured (Wiser  
184 et al., 2016) and benefits arise from combining multiple turbines as maintenance and construc-  
185 tion costs can be reduced. We hence assume that a future increase in wind park size is plausible.

186 **Changes in the manuscript**

187 The country-wise aggregated wind power is obtained by summing the generation of  
188 100 MW wind parks until the system is fully-renewable on average. The wind park size  
189 was chosen as a compromise between increasing turbine capacities (Wiser et al., 2016) and  
190 the need for a sufficient amount of distinct parks. Wind parks are deployed semi-randomly

191 **Minor Point 6**

192 Table 1: this table is not needed and could easily be incorporated either in the main text or in  
193 the legend/caption of Figure 2.

194 **Author's response**

195 We agree with the reviewer that the information could be easily incorporated into the text or  
196 into a caption. Nevertheless, we prefer to keep the table because it is a lot easier to refer to a  
197 table than some section of the text. Note that the table is referenced three times in different  
198 sections of the paper.



199 **Minor Point 7**

200 Figure 2: please use the same colors for the 5 models as in Figure 6 and 7 for consistency.

201 **Author's response**

202 We thank the reviewer for pointing us to this shortcoming and adopt Figure 2 accordingly.

203 **Changes in the manuscript**

204 see Reviewer 1, Minor Point 9

205 **Minor Point 8**

206 Figure 2: What are the units of a) and b)? Lref ? Shouldnt it be percent?

207 **Author's response**

208 a) and b) are given in units of the total European load  $D_{\text{tot}}$ . Unfortunately, the axis label still  
209 referred to an older version of the manuscript. Instead of  $L_{\text{tot}}$  it should read  $D_{\text{tot}}$  which is  
210 defined as

$$D_{\text{tot}} = \int \sum_i D_i(t) dt. \quad (3)$$

211 Note that the demand is assumed to remain constant such that  $D_{\text{tot}}$  is the same number for  
212 all periods.

213 We decided not to use percent as unit in a) and b) to facilitate understanding the difference  
214 to c). While a) and b) refer to absolute values (expressed as fractions of  $D_{\text{tot}}$ ), c) refers to  
215 relative changes of the backup energy (both numerator and denominator depend on  $E_B(\text{ref})$ ).

216 If a) and b) were to be expressed in percent, the y-values would increase by a factor of 100.

217 **Changes in the manuscript**

218 The unit of the y axis in Fig. 2a,b is now  $D_{\text{tot}}$  (see Reviewer 1, Minor Point 9). Moreover,  
219 the caption gives the definition ( $D_{\text{tot}} = \int \sum_i D_i(t) dt$ ) of the total load (see Reviewer 1, Minor  
220 Point 1).

221 **Minor Point 9**

222 Figure 2c: Do you really need this figure? It has the same pattern as b) and it is difficult to  
223 conceptualize/understand. Also, having 2 figures instead of 3 would make them more readable.  
224 Right now they are too small.

225 **Author's response**

226 Both reviewers comment on this Figure (see Reviewer 2, Minor Point 8). Both propose to remove  
227 one panel in order to have more space for the individual subplots. Interestingly, Reviewer 1  
228 suggests to remove c) stating that it has the same pattern as b) while Reviewer 2 suggests  
229 removing (or shrinking) a).

230 We think that the underlying problem is the size of the figure and we agree that it is too  
231 small. In terms of removing some content, we argue that all three panels add value and none  
232 of them can be easily left out because

233 a) allows for comparison of results with the literature (e.g., Rodriguez et al., 2014) and  
234 shows the potential range of backup energy reduction based on transmission. We suppose  
235 that this panel is particularly important for readers without a background in renewable  
236 energy integration as it gives an impression of scale and relevance: Roughly 45% of wind  
237 generation comes at the wrong time if no inter-country or temporal balancing is allowed.

238 b) indicates that the absolute increase is largely independent of grid expansion for three  
239 models. This is an indication for a large-scale effect and connects this section with the  
240 correlation and CWT analysis.

241 c) highlights that the relative change can be as high as 7 % and is substantially higher under  
242 strong grid extension. Given that current strategies of integrating renewables strongly  
243 build upon grid expansion, it is an important conclusion for policy making that those  
244 system are most vulnerable to climate change.

245 We thus suggest to keep all three panels but arrange them differently, such that readability  
246 is enhanced.

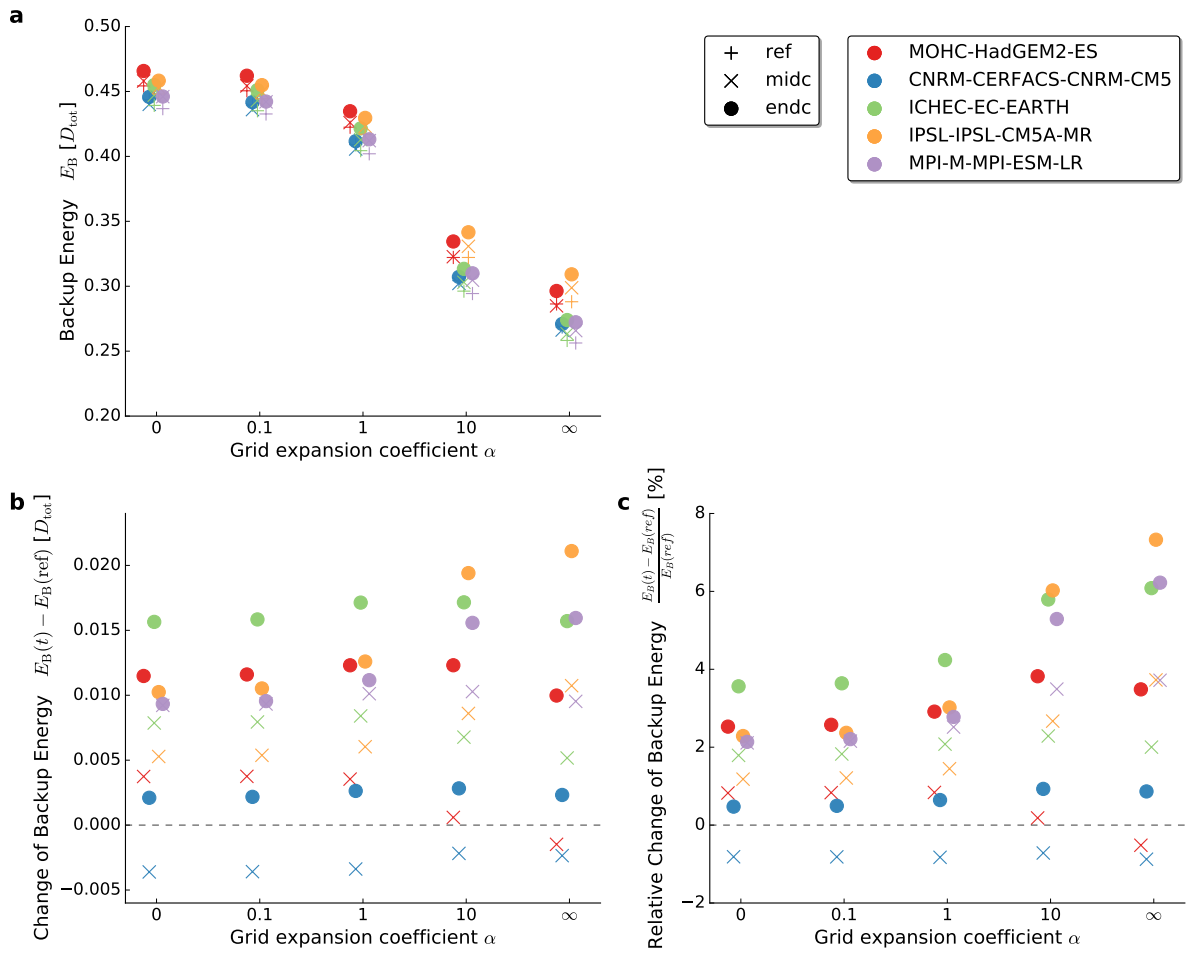

Figure 1: Updated version of Fig. 2

248 **Minor Point 10**

249 Line 209: Is  $L$  the same as generation shortfall? Please mention in what units it is expressed  
250 (MWh/yr)

251 **Author's response**

252 Yes, the unit of  $L$  is  $[L] = 1 \frac{\text{TWh}}{\text{y}}$ .

253  $L$  is not exactly identical to generation shortfall. It is the sum of local generation shortfalls  
254 *during European scarcity*. We propose to use both expressions ('energy that is lacking' and  
255 'generation shortfall') because readers may disagree with respect to which one is more intuitive.

256 **Changes in the manuscript**

257 "We define the annual energy that is lacking (i.e., *generation shortfall*) in country  $i$  during  
258 European scarcity ... for convenience of interpretation.  $L_i$  is given in TWh/y. A high  
259 value of ..."

260 **Minor Point 11**

261 Around line 215: Please compare the values of  $L$  with the total energy or capacity of each  
262 country. For example, from Figure 3 the maximum size of  $L$  is around 250 TWh/yr, which is  
263 possibly small for Germany but would be large for Hungary. Maybe a fraction of total electricity  
264 consumption should be used instead? Basically, we need a sense of how significant a given value  
265 of  $L$  is.

266 **Author's response**

267 We thank the reviewer for his/her comment which we have intensively discussed before sub-  
268 mission. We think that the reviewer's comment raises the question of perspective. Different  
269 questions seem relevant or significant from different points of view. In Fig 3a we decided that  
270 we take a European perspective and ask: How much does every individual country contribute  
271 to the European problem (i.e. lacking energy  $L_{\text{ref}}$ )? These numbers are biased in the sense  
272 that large consumers (such as Germany) have larger contributions than small consumers (like  
273 Hungary) due to their size.

274 One could certainly follow the reviewer's strategy and take a national perspective. What is  
275 the fraction of  $L_{\text{ref}}$  divided by the electricity consumption  $D_i$  in each country? However, these  
276 numbers are also biased in another sense. If a big country has a small  $L_{\text{ref}}$  to  $D_i$  ratio, it might  
277 seem to contribute little to the European problem even if it does contribute substantially.

278 Since both modes of presentation have their use and give answers to different questions, our  
279 idea was to show parts of both approaches. While Fig. 3a takes the European perspective, Fig.  
280 3b takes the national one.

281 With respect to the units used, we argue that the choice is arbitrary and conventions seem  
282 to differ across disciplines. Our colleges dealing with energy system models prefer expressing  
283 energies in kWh and we decided to follow their convention.

284 In any case, we totally agree with the reviewer that the values of  $L_{\text{ref}}$  should be given for  
285 comparison. We thus provide the European aggregate value in the text and add a table to the  
286 Supplementaries giving the national values.

287 **Changes in the manuscript**

288 p. 12, line 213:

289 ... whereas a low value of  $L_i$  indicates a country whose generation shortfall can often be  
290 balanced by imports. In order to compare values of  $L_i$  with loads, we provide country  
291 values for  $D_i$  in the Supplementary Material E. The European sum is  $\sum_i D_i \approx 3100$  TWh.

292 Values for  $\nu$  and  $L$  during the reference period are shown in Fig. 3a,b. Large consumers  
293 like Germany and France are also the dominant contributors to European scarcity in terms  
294 of missing energy (cf. Fig. 3a). The German contribution corresponds to approximately  
295 8% of the European annual load of 3100 TWh. However, the role of these countries,  
296 for example, in comparison to Eastern Europe or Benelux, is less pronounced if only the  
297 occurrence of negative mismatch events  $\nu$  is considered...

298 We add the following table to the supplementaries:

Table 1: Annual sums of country electricity consumption based on hourly 2015 data provided by the European Network of Transmission System Operators for Electricity (2015).

| <b>country</b> | <b>country code</b> | <b>Annual load [TWh]</b> |
|----------------|---------------------|--------------------------|
| Austria        | AT                  | 69.62                    |
| Belgium        | BE                  | 85.22                    |
| Bulgaria       | BG                  | 38.62                    |
| Switzerland    | CH                  | 62.06                    |
| Czech Republic | CZ                  | 63.53                    |
| Germany        | DE                  | 505.27                   |
| Denmark        | DK                  | 33.9                     |
| Estonia        | EE                  | 7.93                     |
| Spain          | ES                  | 248.5                    |
| Finland        | FI                  | 82.5                     |
| France         | FR                  | 471.26                   |
| Great Britain  | GB                  | 282.19                   |
| Greece         | GR                  | 51.4                     |
| Croatia        | HR                  | 17.19                    |
| Hungary        | HU                  | 40.75                    |
| Ireland        | IE                  | 26.57                    |
| Italy          | IT                  | 314.35                   |
| Lithuania      | LT                  | 10.86                    |
| Latvia         | LV                  | 7.07                     |
| Montenegro     | ME                  | 3.42                     |
| Macedonia      | MK                  | 7.84                     |
| Netherlands    | NL                  | 113.25                   |
| Norway         | NO                  | 128.65                   |
| Poland         | PL                  | 149.96                   |
| Portugal       | PT                  | 48.93                    |
| Romania        | RO                  | 52.31                    |
| Sweden         | SE                  | 135.93                   |
| Slovenia       | SI                  | 13.65                    |
| Slovakia       | SK                  | 28.21                    |
| Total          |                     | 3100.94                  |

299 **Minor Point 12**

300 Line 324: please provide a definition/formula of  $f$ . Is it the Coriolis parameter?

301 **Author's response**

For the determination of the CWTs the sea level pressure at 16 horizontal grid points around a pre-defined central point (in this case near Frankfurt, Germany) is considered (see also Fig. 2 in Reyers et al., 2015). The  $f$ -parameter describes the mean horizontal pressure gradient over the domain defined by these 16 grid points and thus can serve as a measure for the wind speed conditions at the central point and the surrounding area.

$$f = \sqrt{dP_z^2 + dP_m^2} \quad (4)$$

302 where  $dP_z$  is the mean pressure gradient in East-West direction (zonal component) and  $dP_m$  is  
303 the mean pressure gradient in North-South direction (meridional component).

304 **Changes in the manuscript**

Aside from the direction of the atmospheric flow a  $f$ -parameter is calculated, which is representative for the instantaneous pressure gradient and thus for the general wind speed conditions over Germany and the surrounding countries.:

$$f = \sqrt{dP_z^2 + dP_m^2}, \quad (5)$$

305 where  $dP_z$  is the mean pressure gradient in East-West direction (zonal component) and  
306  $dP_m$  is the mean pressure gradient in North-South direction (meridional component).  $f$ -  
307 parameters from below 5 hPa per 1000 km (weak MSLP gradient and thus low wind speed  
308 conditions)



309 **Minor Point 13**

310 Figure 6: cannot see the error bars in a) and b).

311 **Author's response**

312 This is probably because the error bars are most often smaller than the circles. However, they  
313 should be clearly visible for CNRM-CM (blue circles) and  $f > 20hPa/1000km$ . We agree that  
314 this is potentially misleading and hence propose to adapt the caption.

315 **Changes in the manuscript**

316       Circles denote the mean over the three considered periods for each model and errorbars  
317       indicate the standard deviation thereof. Errorbars are, however, most often smaller than  
318       the circle size.

319 **Spelling Comment 1**

320 line 60: double parenthesis and note that you need a comma after e.g. (e.g., Chiacchio et al.  
321 2015; Herwehe et al. 2014).

322 **Author's response**

323 We correct the quotation accordingly.

324 **Spelling Comment 2**

325 line 92: double parenthesis and note that you need a comma after e.g. (e.g., Bloomfield et al.  
326 2016).

327 **Author's response**

328 Quotation does not exist any more at this place. See Reviewer 2, Minor Comment 3.

329 **Reviewer 2**

330 We thank the reviewer for his or her clear comments and suggestions to improve the manuscript.

331 **Major Point 1/ General Comment**

332 I consider that this manuscript should be subject to minor revision due to the fact that the  
333 analysis of the results is often unclear given their definitions and use for expressions such as  
334 backup energy and backup needs. Given that the article has been submitted to a journal where  
335 authors and readers come from a diverse range of backgrounds, I believe that a clear nomen-  
336 clature is fundamental. Instances of these conflicts, along with an extended set of minor points  
337 is included next, with suggestions on how to improve the manuscript.

338 **Author's response**

339 We fully agree that an interdisciplinary readership requires exact and clear language in order to  
340 enable everyone to follow the manuscript. With respect to the example of 'backup energy' and  
341 'backup needs', we used them as synonyms because we thought some variety of language might  
342 make the reading more pleasant. However, we agree with the reviewer that this and other parts  
343 of the manuscript are confusing, and therefore decided to clarify it in the revised version.

344 **Changes to the manuscript**

- 345 1. We use the term 'backup energy' throughout the paper and substitute 'backup needs' with  
346 'backup energy' in lines 5, 6, 123, 127, 131, 163, 171, 174, 178, 184, 201, 244, 248, 255,  
347 334, 339, 345, 319, 355, 363,372.
- 348 2. We replace 'backup energy needs' by 'backup energies' in lines 150 and 333.
- 349 3. We give more details regarding the meaning of a coarse-scale representation of the power  
350 system (see Reviewer 2, Minor Point 2)
- 351 4. The derivation of the model equations is expanded to make it easier to follow for people  
352 without a background in energy related research (see Reviewer 2, Minor Point 9).

353 **Minor Point 1**

354 Page 3, lines 60-61: extra parenthesis in citation

355 **Author's response**

356 We corrected this mistake, see Spelling Comment 1 of Reviewer 1.

357 **Minor Point 2**

358 Page 3, line 32: high resolution future projections but coarse representa- tion of the power  
359 system? This might require a better description of the implications and assumptions. Are you  
360 considering the effect of changes in the national grids negligible?

361 **Author's response**

362 We assume that the reviewer refers to page 3, line 82.

363 The meaning of '*coarse scale view on the power system*' is that we neglect many details of real  
364 power systems (because they do not matter for the large-scale energy balance of generation and  
365 demand). For example, we neglect stability issues (e.g., n-1 criterion, supply of apparent power,  
366 cascading effects etc.). The real transmission network is furthermore a system of systems with  
367 different voltage levels designed to serve different purposes (transmission over long distances vs.  
368 appropriateness for end users) and it is controlled by different actors on multiple levels (e.g.  
369 Transmission System Operators and Distribution System Operators). This list is by no means  
370 complete and we do not try to capture any of these. Instead, what matters for changes in wind  
371 energy (balancing) potentials is a high-resolution representation of wind speeds both in space  
372 and time. Therefore we need '*high-resolution regional climate modeling results*'.

373 With respect to the reviewer's last question: On the contrary, we assume that all national  
374 grids have unlimited transmission capacities as explained in p.6 lines 137f. ('We assume all  
375 countries to run a loss-free and unlimited transmission network within their borders.') and in  
376 lines 113f. ('The country-wise aggregated wind power is obtained by summing the generation  
377 of 100 MW wind parks until the system is fully-renewable on average.') That is, all countries  
378 expand their grids such that the maximum benefit from spatial balancing within the country is  
379 achieved. The approach is well established as similar representations of the power system have  
380 been employed in various earlier studies (Rodriguez et al., 2014, 2015b,a; Becker et al., 2014a,b;  
381 Schlachtberger et al., 2017).

382 **Changes in the manuscript**

383 In order to give an idea of assumptions behind our coarse scale approach and facilitate readability  
384 for an interdisciplinary audience we propose to add a sentence:

385 "In this article we study the impact of climate change on the operation conditions for  
386 future fully-renewable power systems. We combine the analysis and simulation of power  
387 systems with high-resolution regional climate modeling results to quantify changes in wind  
388 power generation. We adopt a coarse scale view on the power system to uncover the large-  
389 scale impacts of climate change. The coarse scale perspective neglects details that are  
390 irrelevant for the balancing of demand with wind generation such as supply of apparent  
391 power or different voltage levels in the grid. The focus of this study is to **In particular,**  
392 **we** address the potential of trans-national power transmission to cover regional balancing  
393 needs."

394 **Minor Point 3**

395 Page 5, lines 92-94: This paragraph looks out of place in the Methods section and is redundant  
396 to the Introduction

397 **Author's response**

398 We agree with the reviewer and delete the paragraph. The citation is added in the Introductory  
399 as the paper contributed substantially to the research field.

400 **Changes in the manuscript**

401 Page 5, lines 92-94

402 The power generated by wind turbines and solar photovoltaics is determined by the  
403 weather such that its variability crucially depends on atmospheric conditions (see, e.g.  
404 Bloomfield et al. (2016)). How does climate change affect these conditions and the chal-  
405 lenges of system integration?

406 Page 3, lines 73-74

407 It is thus necessary to consider indicators such as the variability and synchronicity of  
408 generation in addition to total energy yields (Monforti et al., 2016; Bruckner et al., 2014;  
409 Bloomfield et al., 2016).

410 **Minor Point 4**

411 Page 5, line 102: should be sensitivity analyses or a sensitivity analysis

412 **Changes in the manuscript**

413 In the spirit of a sensitivity **analyses** analysis, we evaluate the representative concentration  
414 pathway RCP8.5.

415 **Minor Point 5**

416 Page 6, eqs 1-2: You dont include any representation of existing storage capacity in the system?  
417 How would results change if you did?

418 **Author's response**

419 Yes, we neglect storage in this paper. This is done on purpose following a separation approach.  
420 The issue of variable renewable generation can in principle be solved via (a) spatial balancing  
421 or (b) temporal balancing or any combination of them. The paper under review here follows  
422 strategy (a) while another paper from our group follows strategy (b) (Weber et al., 2017). We  
423 plan to combine both approaches in future work. However, in order to understand the coupled  
424 system, it is helpful to have understood the isolated systems first.

425 One main challenge in combining both strategies is to incorporate the decision making process.  
426 Assume a country which has sufficient renewable generation at a certain point in time to meet  
427 its own demand completely while its storage is half full. Would it aim to import electricity to  
428 further fill its storage? Or would it rather sell the energy it has stored? Or would it prefer not  
429 to do anything? This decision would also very likely depend on the forecasted generation for  
430 the next days. If lots of wind generation for the days ahead is predicted, the country would be  
431 more likely to sell its stored electricity. In restricting our analysis to one option at a time, these  
432 problems are muted for the moment. However, they do have to be tackled in future works.

433 Inclusion of the *current* storage capacities would have a small effect on backup energies. For  
434 example, the current German storage capacity is around  $S = 0.04$  TWh (Weitemeyer et al.,  
435 2015) while the German annual electricity consumption is at the order of  $D_{\text{Ger}} = 500$  TWh.  
436 The fraction  $S/D_{\text{Ger}} = 8 \cdot 10^{-5}$  is hence small and allows to store a bit less than 45 minutes  
437 of average German load. Weitemeyer et al. (2015) study the effect of storage on a renewable  
438 German power system with a mix of PV and wind for different renewable penetrations. They  
439 find that a storage of 0.1 TWh would allow to reduce backup energy by around 5% as compared  
440 to a no storage scenario in a fully-renewable system (see Fig. 2 in Weitemeyer et al., 2015). The  
441 effect of *current* storage capacity on the system studied in our paper is considerably smaller  
442 because (a) the current storage size is only 40% of 0.1 TWh and (b) they incorporate 40% PV  
443 generation which can be more easily stored than wind because it dominantly follows a diurnal  
444 cycle. Potential backup energy reductions due to current storage are thus at the order of 1%.  
445 This is clearly smaller than the potential reductions from grid expansion studied here (roughly  
446 15% for  $\alpha = 10$ , see Fig. 2a).

447 However, including *very large* storage infrastructure would even have the ability to reduce  
448 backup energies to zero in the simplified system studied here (if energy losses from conversion are  
449 neglected). This is due to to the long-term balance between generation and load (Supplementary,  
450 Eq. 4). Unlimited storage would shift excess energy from periods of overgeneration to periods  
451 when generation shortfall is experienced.



452 **Minor Point 6**

453 Page 6, line 151: a 20yr time slice only allows to account for a portion of natural variability:  
454 interannual rather than decadal, and you mention in your introduction that larger time-scales  
455 also have an impact on the power system operation

456 **Author's response**

457 We do agree that the sentence overstates and needs to be relativized since we certainly ignore  
458 variability on very long timescales. We also agree with the reviewer that a 20 year time slice does  
459 not allow to assess decadal variability in a meaningful way. However, we do not consider one  
460 20 year time slice but five of them because we use the output of five different models. Since the  
461 models have no reason to be synchronized, it is plausible to assume that they are in different  
462 states with respect to modes of natural variability. A *robust* change across all models (such  
463 as the increase in backup energy reported in the paper) is hence likely not rooted in decadal  
464 variability with a recurrence time of a couple of decades.

465 **Changes in the manuscript**

466 We suggest to replace the sentence by the (slightly modified) more accurate explanation in the  
467 table caption

468 **Time frames of 20 year duration are chosen to account for natural climatic variability (see**  
469 **Table 1).**

470 Time frames are chosen to contain 20 years in order to capture natural variability of the  
471 climate system on a multi-year timescale while still ensuring that elapsed time between  
472 periods is long enough to consider them distinctly (see Table 1). Since GCMs do not  
473 reproduce natural variations synchronously (Farneti, 2017), robust signals found in the  
474 ensemble are very unlikely to be rooted in natural variations with a recurrence time of  
475 a couple of decades (such as the Atlantic Meridional Oscillation or the North Atlantic  
476 Oscillation; see Peings and Magnusdottir (2014) for a discussion of their role in mediating  
477 atmospheric conditions).

478 The new caption of table 1 then reads:

479 **Periods are chosen to contain 20 years in order to capture natural variability of the climate**  
480 **system on a multi-year timescale while still ensuring that elapsed time between periods is**  
481 **long enough to consider them distinctly. Since GCMs do not reproduce natural variations**  
482 **synchronously (Farneti, 2017), robust signals found in the ensemble are very unlikely to**  
483 **be rooted in natural variations with a recurrence time of a couple of decades (such as the**  
484 **Atlantic Meridional Oscillation or the North Atlantic Oscillation; see Peings and Mag-**  
485 **nusdottir (2014) for a discussion of their role in mediating atmospheric conditions). The**  
486 **reference period ref ends before 2005 because GCMs in CMIP5 are driven by historic**  
487 **emissions only until this date and follow different representative concentration scenarios**  
488 **afterwards.**

489 Periods used in this study. The reference period ref ends before 2005 because GCMs in  
490 CMIP5 are driven by historic emissions only until this date and follow different represen-  
491 tative concentration scenarios afterwards.

492 **Minor Point 7**

493 Figure 1 and Table 1 captions: These are very long. Consider including more of this information  
494 (which even includes multiple references!) in the Methods section.

495 **Author's response**

496 We thank the reviewer for making us aware of this shortcoming.

497 **Changes in the manuscript**

498 We provide a common answer in Reviewer 1, Minor Point 1 as both critiques are identical.

499 **Minor Point 8**

500 Figure 2: one really cant tell much from panel a on this figure. Consider removing it and using  
501 only the changes, or just show it for fewer expansion coefficients (or just no expansion) to be  
502 able to zoom in. On the caption, there is a typo and should read later on. And you are also  
503 discussing a lot of the results on the caption!

504 **Author's response**

505 We thank the reviewer for his feedback on this Figure and agree largely.

506 **Changes in the manuscript**

507 The general criticism is similar to Reviewer 1, Minor Point 9 where we provide a common  
508 answer.

509 Moreover, we correct the typo and shorten the captions as given in Reviewer 1, Minor Point  
510 1.

511 **Minor Point 9**

512 Page 10, lines 75-77: The assessment is not clear. An increase in backup energy needs implies  
513 under your definition that there is more of the local energy mismatch (difference between demand  
514 and volatile RE) that could not be met by transmissions. So, how can this be due to more excess  
515 energy? Is the problem on the assessment of line 74, since the increase is not on backup NEEDS  
516 but rather on energy available for transmission? If what you show on the plot (panel a) is back  
517 up energy, that is decreasing with network expansion. You can see how your descriptions are  
518 leaving big gaps in the interpretation of results.

519 **Author's response**

520 We suppose that there is a misunderstanding here which can easily be resolved. In the system  
521 under consideration, more backup energy directly leads to more excess energy and excess energy  
522 has to be curtailed. This is because we assume that renewables generate as much electricity as  
523 needed on average. The statement can be formally derived from Eq. (2) in the manuscript by  
524 summing over all countries  $i$  and integrating over an entire period from  $t_s$  to  $t_e$  which yields:

$$\int_{t_s}^{t_e} \sum_i M_i(t)dt + \int_{t_s}^{t_e} \sum_i B_i(t)dt + \int_{t_s}^{t_e} \sum_i F_i(t)dt = \int_{t_s}^{t_e} \sum_i C_i(t)dt. \quad (6)$$

525 Recall that  $M_i$  is the mismatch,  $B_i$  is backup power,  $F_i$  denotes imports or exports and  $C_i$   
526 denotes curtailment. The first term in Eq. 6 vanishes because of the assumption of a fully-  
527 renewable system (cf. Supplementary Eq. 12). The third term also vanishes because every  
528 import in one country ( $F_j > 0$ ) is an export in another ( $F_k < 0$ ) such that in total all imports  
529 are balanced by exports ( $\sum_i F_i(t) = 0$ ). It follows that

$$\int_{t_s}^{t_e} \sum_i B_i(t)dt = \int_{t_s}^{t_e} \sum_i C_i(t). \quad (7)$$

530 The left hand side is the backup energy  $E_B$  as defined in Eq. (3) in the manuscript and the  
531 right hand side is European curtailment during a period. (Note that Eq. 3 in the manuscript  
532 includes a minimization of  $B_i$  which is needed to determine the im- and exports. For an  
533 aggregated European assessment, the actual im- and exports do not matter since they cancel  
534 anyway as argued above.)

535 **Changes in the manuscript**

536 We suggest restructuring of the sentence as follows

537 **The increase implies more excess energy and also more curtailment since we consider a**  
538 **scenario where 100% of electricity is generated from renewables on average.**

539 Since we consider a scenario where 100% of electricity is generated from renewables on  
540 average, an increase of backup energy is accompanied by an increase of excess energy  
541 which has to be curtailed.

542 Moreover, we add some information to the methods section to enhance readability for non-  
543 experts in the field of energy research:

544 p. 6, lines 137-138: The assumption of a fully-renewable system means that all countries  
545 generate as much electricity as needed on average ( $\int_{t_s}^{t_e} M_i(t)dt = 0$ ). Furthermore, we **We**  
546 assume all countries to run a loss-free and unlimited transmission network within their borders.

547 p. 6, lines 139-147:

548  
549  
550

If a country has a negative mismatch ( $M_i < 0$ , red circles in Fig. 1d), it tries to import energy. If it has a positive mismatch ( $M_i > 0$ , green circles in Fig. 1d), it tries to export energy. For each country  $i$  the power balance must be satisfied:

$$M_i(t) + B_i(t) + F_i(t) = C_i(t),. \quad (8)$$

551  
552  
553  
554  
555  
556  
557  
558  
559  
560  
561  
562  
563  
564  
565  
566  
567

The mismatch  $M_i$  can be compensated either by power generation from conventional backup power plants ( $B_i \geq 0$ ), the curtailment of renewable power generation ( $C_i \geq 0$ ) or by imports ( $F_i > 0$ ) or exports ( $F_i < 0$ ). To utilize renewable generation in an optimal way, countries will first try to balance power using im- and exports. However, a perfect balancing of all nodes is impossible if there is a continent-wise shortage or overproduction. Furthermore, cross-boarder flows along lines are bound by the directional Net Transfer Capacities (NTCs; see Supplement A for details), which may also impede balancing for some nodes. Power balance must then be satisfied by local means: In the case of a shortage, power must be backed up by conventional generators ( $B_i > 0$ ). **where  $F_i$  represents imports ( $F_i > 0$ ) or exports ( $F_i < 0$ ) to/from country  $i$ . Cross-boarder flows along lines are bound by the directional Net Transfer Capacities (NTCs; see Supplement A for details). If overall shortage or line limits prohibit sufficient imports, power can also be backed up locally ( $B_i \geq 0$ ).** Similarly, if excess power can not be exported, it has to be curtailed ( $C_i \geq 0$ ). We recognize that the technical details of backup generation often matter for implementation (Schlachtberger et al., 2016) but we focus on gross electricity needs in this study.

Additionally we add on page 7, line 155:

The European amount of backup energy is identical to the amount of curtailment over a full period. This is a direct consequence of the assumptions made and can be formally derived by summing Eq. 6 over all countries and integrating over an entire period. Since  $\int_{t_s}^{t_e} M_i(t)dt = 0$  (each country is fully renewable on average) and  $\sum_i F_i = 0$  (all imports to one country  $F_j = c$  are exports from another  $F_k = -c$ ) it follows that:

$$\int_{t_s}^{t_e} \sum_i B_i(t)dt = \int_{t_s}^{t_e} \sum_i C_i(t). \quad (9)$$

568

A change of the backup energy thus directly implies a change in total curtailment.

569 **Minor Point 10**

570 Page 10, lines 183-184: this is not true for all ensemble members. Changes in CNRM and  
571 MOHC are not that pronounced.

572 **Author's response**

573 While there is also an increase for CNRM and MOHC, we agree that the sentence is not  
574 strictly true for the two models mentioned. Given that the subsequent sentence deals with the  
575 considerable inter-model spread we suppose to add another sentence after this one.

576 **Changes in the manuscript**

577 There is considerable inter-model spread regarding the magnitude of change which varies  
578 by up to one order of magnitude depending on the climate model (see Fig. 2b,  $\alpha = \infty$ ).  
579 In particular, changes for CNRM are generally weak and HadGEM2 features only a slight  
580 overall increase with grid expansion.

581 **Minor Point 11**

582 Figure 8b, Supplementary Information: How can the backup energy increase by incorporating  
583 PV? You can see it in the two larger  $\alpha$  values for the CNRM model in the *midc* period.

584 **Author's response**

585 If we understand correctly, the reviewer compares Fig. 2b in the manuscript and Fig. 8b in the  
586 supplement. While Fig. 2b always gives clearly negative absolute changes of the backup energy  
587 for CNRM, the change of backup energy approaches zero under  $\alpha \in [10, \infty]$  in Fig. 8b. This  
588 means that the backup energy almost stays constant from *ref* to *midc* if PV is included, while  
589 it is reduced when PV is ignored.

590 To start with, backup energy (in absolute terms) is not higher but lower if PV is included  
591 as Figs. 2a and 8a show. For example, for  $\alpha = 10$  the backup energy without PV is roughly  
592  $E_B = 0.3L_{\text{tot}}$  while it comes down to roughly  $E_B = 0.25L_{\text{tot}}$  if PV is included. This decline is to  
593 be expected because wind and solar are to some extent complementary and their combination  
594 allows to reduce generation shortfall.

595 The observation that the backup energy decreases for small values of  $\alpha$  in Fig. 8b indicates  
596 that the climatic changes are beneficial for the isolated or weakly connected European System  
597 following CNRM by *midc*. Grid expansion allows for spatial smoothing of the generation and  
598 brings backup energies down (cf. Fig. 8a). However, in a strongly connected system, no further  
599 positive effects due to climate change occur.

600 As a general note, PV is not considered additionally to wind generation in this study but  
601 rather as a *substitute* for a certain fraction of wind generation (cf. Supplementary ll. 607 ff.).  
602 In those scenarios where PV is included, only 71% of the load has to be met by wind (leading  
603 to fewer wind parks) while the remainder is provided by PV.

604 **Minor Point 12**

605 Page 10, line 194: should be reveal

606 **Changes in the manuscript**

607 Results are barely sensitive to changes in the load timeseries as an assessment using  
608 constant loads ~~reveils~~ reveals (cf. Supplementary C).



609 **Minor Point 13**

610 Page 11, lines 199-201: how is this a lower bound to back up needs if this is this represents the  
611 worst case scenario for mismatch. I can see how it is a lower bound for the mismatch  $M_i$  , since  
612 it is negative.

613 **Author's response**

614 We know that backup energy decreases monotonously with grid expansion (see Fig. 2a). This  
615 is because a well developed grid allows for spatial integration of volatile renewable generation.  
616 The case of unlimited transmission (i.e.  $\alpha = \infty$ ) hence yields the lowest backup energies and  
617 provides a lower bound for backup energies. In other words, backup energies in a real system  
618 ( $\alpha < \infty$ ) must be higher than the ones discussed in this section.

619 **Minor Point 14**

620 Page 12, line 232: should be importing

621 **Author's response**

622 The argument works in both directions. If a set of countries suffers from generation shortfall  
623 while Europe suffers from a generation shortfall, they can neither export electricity to alleviate  
624 the *overall* shortage nor import electricity to alleviate *their own* shortage. We prefer to keep  
625 the sentence as it is because we want to highlight that these countries can not contribute to  
626 solve the overall problem.

627 **Minor Point 15**

628 Page 13, lines 257-259: this clarification should have been made in the Methods section, since  
629 it was also an assumption of the previous analysis.

630 **Author's response**

631 We thank the reviewer and agree that the sentence fits better to the methods section.

632 **Changes in the manuscript**

633 We propose to include the sentence in the Methods section, p. 5, ll. 115

634 ... following the approach of (Monforti et al., 2016). In order to single out climate change  
635 induced alterations, we fix the technological parameters such as hub heights or turbine  
636 efficiencies, and we do not account for changes in the consumption such as load shifting  
637 or sector coupling throughout the 21st century.

638 **Minor Point 16**

639 Figure 7: check language of labels in x axis. To mix the directions and rotations in the same  
 640 plot makes it impossible to see any changes in the first. Consider adding two panels!

641 **Author’s response**

642 We thank the reviewer for making us aware of the language issues and correct them accordingly.

643 We would like to stress that we consider 10 distinct CWTs. 8 of them are directional (N, NE,  
 644 E etc.) and 2 of them are rotational (Anticyclonic, Cyclonic). There are no mixed CWTs in  
 645 this assessment. The misunderstanding might originate from p.19 lines 321-324 where 'and/or'  
 646 should read 'or'. We correct this mistake.

647 Based on this, it is interesting that most of the change is caused by rotational CWTs which  
 648 is clearly visible in the plot as it is. If we were to use two different panels for directional and  
 649 rotational CWTs, this information would potentially be masked. We therefore prefer not to  
 650 add two panels.

651 **Changes in the manuscript**

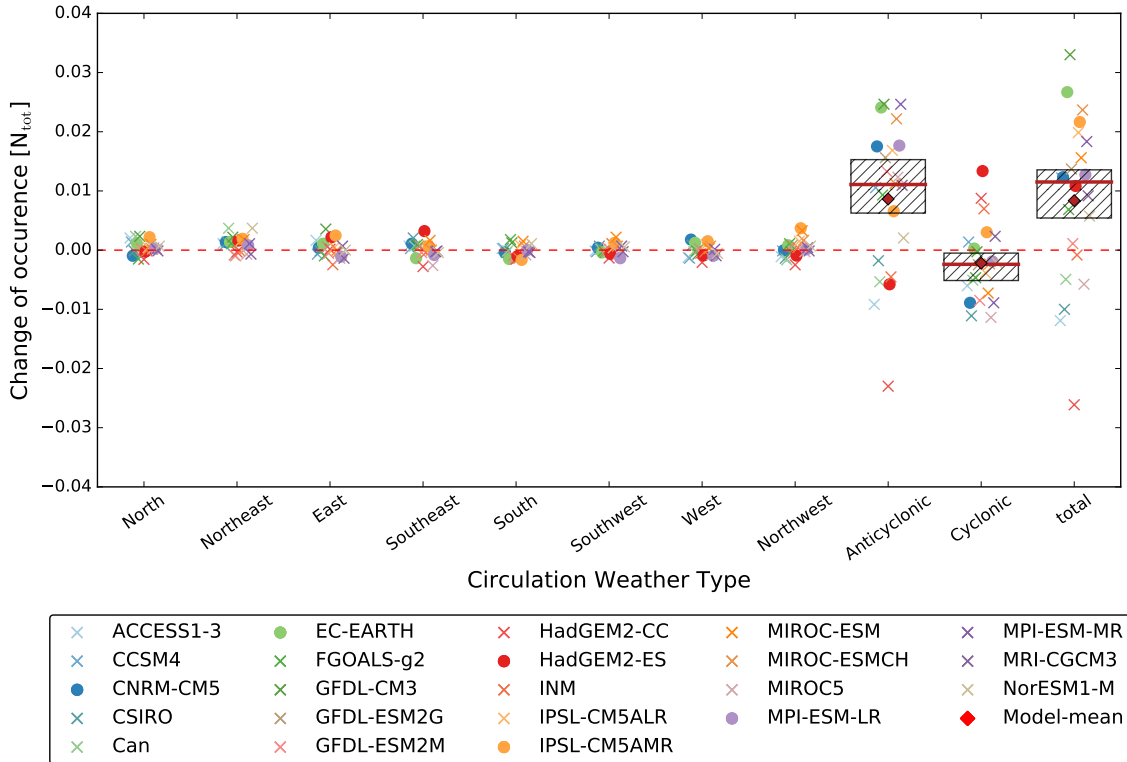

Figure 2: Updated version of Fig. 7.

652 p.19 lines 321-324:

653 Daily mean sea level pressure (MSLP) values at 16 GCM grid points around a central  
 654 point located in Germany are used to assign the near-surface atmospheric flow over Europe  
 655 to either a directional flow (north, northeast, east, . . .) **and/or** a rotational flow  
 656 (anticyclonic, cyclonic).

657 **Minor Point 17**

658 Page 20, lines 345-6: It seems like you are making assumptions about more spatially homo-  
659 geneous condition from an analysis that is based on a single point. How can you draw those  
660 conclusions from CWT?

661 **Author's response**

662 As already stated in the submitted manuscript, for the determination of the CWTs the sea  
663 level pressure at 16 horizontal grid points around a pre-defined central point (in this case near  
664 Frankfurt, Germany) is considered (see also Fig. 2 in Reyers et al., 2015). Hence, the analysis is  
665 not based on a single point but on a horizontal pressure field covering large parts of the European  
666 sector. As a consequence, Reyers et al. (2015) could demonstrate that CWTs enable reliable  
667 conclusions about the regional wind conditions for a domain which covers Germany and the  
668 surrounding countries. It is thus possible to make assumptions about the spatial homogeneity,  
669 as stated in the submitted manuscript.

670 **Minor Point 18**

671 Page 23, lines 372-2: Comment starting in Moreover... need revision

672 **Author's comment**

673 We thank the reviewer for his comment and modify as given below. In particular, we correct  
674 the percentage from 8% to 7% which is more exact (see Fig. 2c) and in line with the number  
675 given in the abstract (see Reviewer 1, Minor Point 2).

676 **Changes in the manuscript**

677 **Moreover**, While the increases of backup energy are robust **yet** , they are also restricted  
678 to relative increases of **87%** (cf. Fig. 2). A fully-renewable electricity system will hence  
679 not become unfeasible due to catastrophic changes.

680 **Other modifications**

681 **Update bibliography**

682 The paper (Schlachtberger et al., 2016) has been accepted in the meantime and is now referenced  
683 correctly.

684 **Substantial new work by Grams et al. (2017)**

685 Grams et al. (2017) showed that volatility of wind generation can be drastically reduced if wind  
686 park locations are chosen based on weather patterns rather than concentrated in the North Sea.  
687 We want to include the reference on page 13 line 242 as

688       Moreover, Greece shows favourable changes for the European system in terms of energy  
689       contributions and occurrences with a high inter-model agreement (cf. Fig. 3c,d). This  
690       finding is particularly interesting as Grams et al. (2017) show that a combination of wind  
691       parks allocated in the North Sea and the Balkans allows to reduce volatility substan-  
692       tially under current climatic conditions. Based on our results, this positive effect from  
693       incorporating the Balkans would further be enhanced under strong climate change.

694 **References**

- 695 Gorm B. Andresen, Anders A. Sndergaard, and Martin Greiner. Validation of Danish wind  
696 time series from a new global renewable energy atlas for energy system analysis. *Energy*,  
697 93:1074–1088, December 2015. ISSN 03605442. doi: 10.1016/j.energy.2015.09.071. URL  
698 <http://linkinghub.elsevier.com/retrieve/pii/S0360544215012815>.
- 699 S. Becker, R.A. Rodriguez, G.B. Andresen, S. Schramm, and M. Greiner. Transmission grid  
700 extensions during the build-up of a fully renewable pan-European electricity supply. *Energy*,  
701 64:404–418, January 2014a. ISSN 03605442. doi: 10.1016/j.energy.2013.10.010. URL <http://linkinghub.elsevier.com/retrieve/pii/S0360544213008438>.
- 703 Sarah Becker, Bethany A. Frew, Gorm B. Andresen, Timo Zeyer, Stefan Schramm, Mar-  
704 tin Greiner, and Mark Z. Jacobson. Features of a fully renewable US electricity sys-  
705 tem: Optimized mixes of wind and solar PV and transmission grid extensions. *Energy*,  
706 72:443–458, August 2014b. ISSN 03605442. doi: 10.1016/j.energy.2014.05.067. URL  
707 <http://linkinghub.elsevier.com/retrieve/pii/S0360544214006343>.
- 708 H C Bloomfield, D J Brayshaw, L C Shaffrey, P J Coker, and H E Thornton. Quantify-  
709 ing the increasing sensitivity of power systems to climate variability. *Environmental Re-*  
710 *search Letters*, 11(12):124025, December 2016. ISSN 1748-9326. doi: 10.1088/1748-9326/11/  
711 12/124025. URL [http://stacks.iop.org/1748-9326/11/i=12/a=124025?key=crossref.](http://stacks.iop.org/1748-9326/11/i=12/a=124025?key=crossref.be7b8a57ca6e72c9817ec8df7975db1b)  
712 [be7b8a57ca6e72c9817ec8df7975db1b](http://stacks.iop.org/1748-9326/11/i=12/a=124025?key=crossref.be7b8a57ca6e72c9817ec8df7975db1b).
- 713 . European Network of Transmission System Operators for Electricity. Hourly load values for  
714 all countries for a specific month (in MW), 2015. URL [https://www.entsoe.eu/db-query/](https://www.entsoe.eu/db-query/consumption/mh1v-all-countries-for-a-specific-month)  
715 [consumption/mh1v-all-countries-for-a-specific-month](https://www.entsoe.eu/db-query/consumption/mh1v-all-countries-for-a-specific-month).
- 716 Riccardo Farneti. Modelling interdecadal climate variability and the role of the ocean. *Wiley*  
717 *Interdisciplinary Reviews: Climate Change*, 8(1):e441, January 2017. ISSN 17577780. doi:  
718 10.1002/wcc.441. URL <http://doi.wiley.com/10.1002/wcc.441>.
- 719 Iratxe Gonzalez Aparicio, Andreas Zucker, Francesco Careri, Fabio Monforti, Thomas Huld, and  
720 Jake Badger. EMHIREs dataset; Part 1: Wind power generation. Technical Report EUR  
721 28171 EN, Joint Research Center, 2016.
- 722 Christian M. Grams, Remo Beerli, Stefan Pfenninger, Iain Staffell, and Heini Wernli. Balancing  
723 Europes wind-power output through spatial deployment informed by weather regimes. *Nature*  
724 *Climate Change*, July 2017. ISSN 1758-678X, 1758-6798. doi: 10.1038/nclimate3338. URL  
725 <http://www.nature.com/doifinder/10.1038/nclimate3338>.
- 726 Michael D. Mastrandrea, Christopher B. Field, Thomas F. Stocker, Ottmar Edenhofer,  
727 Kristie L. Ebi, David J. Frame, Hermann Held, Elmar Kriegler, Katharine J. Mach, Patrick R.  
728 Matschoss, and others. Guidance note for lead authors of the IPCC fifth assessment report  
729 on consistent treatment of uncertainties. 2010. URL [http://pubman.mpdl.mpg.de/pubman/](http://pubman.mpdl.mpg.de/pubman/item/escidoc:2147184/component/escidoc:2147185/uncertainty-guidance-note.pdf)  
730 [item/escidoc:2147184/component/escidoc:2147185/uncertainty-guidance-note.pdf](http://pubman.mpdl.mpg.de/pubman/item/escidoc:2147184/component/escidoc:2147185/uncertainty-guidance-note.pdf).
- 731 F. Monforti, M. Gaetani, and E. Vignati. How synchronous is wind energy production among  
732 European countries? *Renewable and Sustainable Energy Reviews*, 59:1622–1638, June 2016.  
733 ISSN 13640321. doi: 10.1016/j.rser.2015.12.318. URL [http://linkinghub.elsevier.com/](http://linkinghub.elsevier.com/retrieve/pii/S1364032115017013)  
734 [retrieve/pii/S1364032115017013](http://linkinghub.elsevier.com/retrieve/pii/S1364032115017013).
- 735 Yannick Peings and Gudrun Magnusdottir. Forcing of the wintertime atmospheric circula-  
736 tion by the multidecadal fluctuations of the North Atlantic ocean. *Environmental Re-*  
737 *search Letters*, 9(3):034018, March 2014. ISSN 1748-9326. doi: 10.1088/1748-9326/



- 738 9/3/034018. URL [http://stacks.iop.org/1748-9326/9/i=3/a=034018?key=crossref.](http://stacks.iop.org/1748-9326/9/i=3/a=034018?key=crossref.78c09fa6ee45935be9d64175d1959d01)  
739 78c09fa6ee45935be9d64175d1959d01.
- 740 Mark Reyers, Joaquim G. Pinto, and Julia Moemken. Statistical-dynamical downscaling for  
741 wind energy potentials: evaluation and applications to decadal hindcasts and climate change  
742 projections. *International Journal of Climatology*, 35(2):229–244, February 2015. ISSN  
743 08998418. doi: 10.1002/joc.3975. URL <http://doi.wiley.com/10.1002/joc.3975>.
- 744 Rolando A. Rodriguez, Sarah Becker, Gorm B. Andresen, Dominik Heide, and Martin Greiner.  
745 Transmission needs across a fully renewable European power system. *Renewable Energy*,  
746 63:467–476, March 2014. ISSN 09601481. doi: 10.1016/j.renene.2013.10.005. URL [http://](http://linkinghub.elsevier.com/retrieve/pii/S0960148113005351)  
747 [linkinghub.elsevier.com/retrieve/pii/S0960148113005351](http://linkinghub.elsevier.com/retrieve/pii/S0960148113005351).
- 748 Rolando A. Rodriguez, Sarah Becker, and Martin Greiner. Cost-optimal design of a simpli-  
749 fied, highly renewable pan-European electricity system. *Energy*, 83:658–668, April 2015a.  
750 ISSN 03605442. doi: 10.1016/j.energy.2015.02.066. URL [http://](http://linkinghub.elsevier.com/retrieve/pii/S0360544215002212)  
751 [linkinghub.elsevier.com/retrieve/pii/S0360544215002212](http://linkinghub.elsevier.com/retrieve/pii/S0360544215002212).
- 752 Rolando A. Rodriguez, Magnus Dahl, Sarah Becker, and Martin Greiner. Localized vs.  
753 synchronized exports across a highly renewable panEuropean transmission network. *En-*  
754 *ergy, Sustainability and Society*, 5(1), December 2015b. ISSN 2192-0567. doi: 10.  
755 1186/s13705-015-0048-6. URL [http://](http://energysustainsoc.springeropen.com/articles/10.1186/s13705-015-0048-6)  
756 [energysustainsoc.springeropen.com/articles/](http://energysustainsoc.springeropen.com/articles/10.1186/s13705-015-0048-6)  
[10.1186/s13705-015-0048-6](http://energysustainsoc.springeropen.com/articles/10.1186/s13705-015-0048-6).
- 757 D.P. Schlachtberger, S. Becker, S. Schramm, and M. Greiner. Backup flexibility classes in  
758 emerging large-scale renewable electricity systems. *Energy Conversion and Management*,  
759 125:336–346, October 2016. ISSN 01968904. doi: 10.1016/j.enconman.2016.04.020. URL  
760 <http://linkinghub.elsevier.com/retrieve/pii/S0196890416302606>.
- 761 D.P. Schlachtberger, T. Brown, S. Schramm, and M. Greiner. The benefits of cooperation  
762 in a highly renewable European electricity network. *Energy*, 134:469–481, September 2017.  
763 ISSN 03605442. doi: 10.1016/j.energy.2017.06.004. URL [http://](http://linkinghub.elsevier.com/retrieve/pii/S0360544217309969)  
764 [linkinghub.elsevier.com/retrieve/pii/S0360544217309969](http://linkinghub.elsevier.com/retrieve/pii/S0360544217309969).
- 765 Iain Staffell and Stefan Pfenninger. Using bias-corrected reanalysis to simulate current and  
766 future wind power output. *Energy*, 114:1224–1239, November 2016. ISSN 03605442.  
767 doi: 10.1016/j.energy.2016.08.068. URL [http://](http://linkinghub.elsevier.com/retrieve/pii/S0360544216311811)  
768 [linkinghub.elsevier.com/retrieve/](http://linkinghub.elsevier.com/retrieve/pii/S0360544216311811)  
[pii/S0360544216311811](http://linkinghub.elsevier.com/retrieve/pii/S0360544216311811).
- 769 Isabelle Tobin, Sonia Jerez, Robert Vautard, Françoise Thais, Erik van Meijgaard, Andreas  
770 Prein, Michel Deque, Sven Kotlarski, Cathrine Fox Maule, Grigory Nikulin, Thomas Noel,  
771 and Claas Teichmann. Climate change impacts on the power generation potential of a Euro-  
772 pean mid-century wind farms scenario. *Environmental Research Letters*, 11(3):034013, March  
773 2016. ISSN 1748-9326. doi: 10.1088/1748-9326/11/3/034013. URL [http://](http://stacks.iop.org/1748-9326/11/i=3/a=034013?key=crossref.7da88a5a7c6dea354ce58294e3c7482b)  
774 [stacks.iop.](http://stacks.iop.org/1748-9326/11/i=3/a=034013?key=crossref.7da88a5a7c6dea354ce58294e3c7482b)  
[org/1748-9326/11/i=3/a=034013?key=crossref.7da88a5a7c6dea354ce58294e3c7482b](http://stacks.iop.org/1748-9326/11/i=3/a=034013?key=crossref.7da88a5a7c6dea354ce58294e3c7482b).
- 775 Juliane Weber, Jan Wohland, Mark Reyers, Julia Moemken, Charlotte Hoppe, Joaquim G.  
776 Pinto, and Dirk Witthaut. Impact of climate change on backup and storage needs in a  
777 wind-dominated European power system. *in review*, 2017.
- 778 Stefan Weitemeyer, David Kleinhans, Thomas Vogt, and Carsten Agert. Integration of Re-  
779 newable Energy Sources in future power systems: The role of storage. *Renewable En-*  
780 *ergy*, 75:14–20, March 2015. ISSN 09601481. doi: 10.1016/j.renene.2014.09.028. URL  
781 <http://linkinghub.elsevier.com/retrieve/pii/S096014811400593X>.

782 Ryan Wiser, Mark Bolinger, Galen Barbose, Nam Darghouth, Ben Hoen, Andrew Mills, Joe  
783 Rand, Dev Millstein, Kevin Porter, and Rebecca Widiss. 2015 Wind Technologies Mar-  
784 ket Report. August 2016. URL [https://pubarchive.lbl.gov/islandora/object/ir%](https://pubarchive.lbl.gov/islandora/object/ir%3A1005951/datastream/PDF/download/citation.pdf)  
785 [3A1005951/datastream/PDF/download/citation.pdf](https://pubarchive.lbl.gov/islandora/object/ir%3A1005951/datastream/PDF/download/citation.pdf).

# More Homogeneous Wind Conditions Under Strong Climate Change Decrease the Potential for Inter-State Balancing of Electricity in Europe

Jan Wohland<sup>1,2</sup>, Mark Reyers<sup>3</sup>, Juliane Weber<sup>1,2</sup>, and Dirk Witthaut<sup>1,2</sup>

<sup>1</sup>Forschungszentrum Jülich, Institute for Energy and Climate Research (IEK-STE), 52428 Jülich, Germany

<sup>2</sup>Institute for Theoretical Physics, University of Cologne, 50937 Cologne, Germany

<sup>3</sup>Institute for Geophysics and Meteorology, University of Cologne, Germany

*Correspondence to:* Jan Wohland (j.wohland@fz-juelich.de)

**Abstract.** Limiting anthropogenic climate change requires the fast decarbonisation of the electricity system. Renewable electricity generation is determined by the weather and is hence subject to climate change. We simulate the operation of a coarse-scale fully-renewable European electricity system based on downscaled high resolution climate data from EURO-CORDEX. Following a high emission pathway (RCP8.5), we find a robust but modest increase (up to 7%) of backup needs energy in Europe until the end of the 21st century. The absolute increase of the backup needs energy is almost independent of potential grid expansion, leading to the paradoxical effect that relative impacts of climate change increase in a highly interconnected European system. The increase is rooted in more homogeneous wind conditions over Europe resulting in extensive parallel intensified simultaneous generation shortfalls. Individual country contributions to European generation short-fall increase by up to 9 TWh/y, reflecting an increase of up to 4%. Our results are strengthened by comparison with a large CMIP5 ensemble using an approach based on Circulation Weather Types.

## 1 Introduction

Massive reductions of greenhouse gas emissions are needed in order to reach the temperature goals  
15 defined in the Paris Agreement (UNFCCC, 2015; Schleussner et al., 2016b). With a share of around  
35% of current emissions being caused by the electricity system (Bruckner et al., 2014), its decar-  
bonisation is the key to any mitigation strategy. However, today's pledges are not yet sufficient to  
limit warming to below 2°C, not to mention 1.5°C (Rogelj et al., 2016).

In addition to the need of mitigating carbon emissions, a second interaction between the energy  
20 system and the climate system exists and becomes increasingly important with higher penetrations  
of renewable energies. Volatile renewable energy generation is driven by weather conditions which  
are subject to climate change. Large backup facilities are needed to guarantee a stable supply of  
electricity during periods of low wind and solar power generation (Rodriguez et al., 2014). Further-  
more, climate change affects the demand for electric power (Auffhammer et al., 2017) as well as the  
25 operation conditions for thermo- and hydroelectric power plants which serve as backup (van Vliet  
et al., 2016, 2012). However, feedback effects of large-scale wind fleets on atmospheric flows are  
limited (Vautard et al., 2014).

In line with the Paris Agreement, the scientific community is increasingly interested in differenti-  
ating climate impacts at 1.5°C and 2°C (Schleussner et al., 2016a; James et al., 2017) and the IPCC  
30 currently prepares a special report on 1.5°C. However, many low-carbon pathways rely on negative  
emissions during the second half of this century (Rogelj et al., 2015; van Vuuren et al., 2016), al-  
though their feasibility at scale remains debated (Anderson and Peters, 2016). Future emissions from  
existing CO<sub>2</sub>-emitting infrastructure (Davis et al., 2010) and current political developments in the  
US (Trump, 2017), among others, might impede fast decarbonisation. Different climatic futures are  
35 hence plausible and mitigation strategies need to work in all of them. Therefore, we are led to the  
question: How sensitive is a fully-renewable electric power system to climate change? In particular:  
How severely could strong climate change impact such a system?

Anthropogenic climate change affects the large-scale atmospheric flow and thus the operation con-  
ditions for renewable power generation. State-of-the-art global climate models reveal that changes  
40 in zonal wind depend on the temperature structure of the lower atmosphere (Haarsma et al., 2013)  
and that zonal-mean zonal wind and eddy kinetic energy decline almost linearly in time due to polar  
amplification (Coumou et al., 2015). There are also natural sources of variability on up to decadal  
timescales. Some of them originate from ocean-atmosphere interactions in the Atlantic and are po-  
tentially predictable (Haekkinen et al., 2011; Peings and Magnusdottir, 2014). The North Atlantic  
45 Oscillation has been shown to directly influence the operation of inter-connected renewable electric-  
ity systems (Ely et al., 2013). Predictability of such natural variations is of great interest for system  
integration and efforts are undertaken to assess and improve forecasting skills (Moemken et al.,  
2016).

To assess the impact of climate change on the operation of renewable power systems, downscaled  
50 climate model output is needed. It comes at a high temporal and spatial resolution and is better  
suited than global model output to capture local features such as land-sea transitions or mountains  
(Rummukainen, 2016). Temporal resolutions at the sub-daily scale are needed since electricity con-  
sumption varies strongly during the day. Changes in wind energy yields and capacity factors have  
been assessed based on dynamical (Tobin et al., 2015, 2016) and statistical-dynamical downscaling  
55 outputs (Reyers et al., 2015, 2016). Tobin et al. (2016) evaluate the EURO-CORDEX data archive  
and find that changes in the annual wind energy yield across Europe are at the order of 5% and  
models do not agree on the sign of change. Following a different approach that allows for the inclu-  
sion of the output of 22 global climate models, Reyers et al. (2016) report an increasing intra-annual  
gradient between winter and summer wind generation and different trends in Northern and Central  
60 Europe as compared to Southern Europe.

Assessing changes in solar power generation is arguably more difficult due to, among others,  
unresolved processes in relatively coarse climate models and uncertain parameterizations (e.g. (Chi-  
acchio et al., 2015; Herwehe et al., 2014)) (e.g., Chiacchio et al., 2015; Herwehe et al., 2014). Ac-  
knowledging this difficulty and associated uncertainties, an evaluation of the EURO-CORDEX data  
65 finds limited impacts of climate change on solar photovoltaics (PV) potentials (Jerez et al., 2015).  
Southern Europe, having the highest potential for PV, sees only small changes, as an increase in  
downwelling irradiation is counteracted by a decreasing efficiency due to warming. In contrast, the  
output of concentrating solar power systems (CSP) is expected to increase by around 10% because  
the efficiency of CSP increases with temperature (Crook et al., 2011).

70 While wind and solar power sources have shown a remarkable development in the last decades,  
system integration remains a huge challenge (Huber et al., 2014). In a highly renewable power sys-  
tem the timing of generation events becomes crucial for the system. Even in an European electricity  
system that is on average fed by 100% renewables, roughly one quarter of the energy is produced at  
the wrong time and has to be curtailed (Rodriguez et al., 2014, 2015a).

75 It is thus necessary to consider indicators such as the variability and synchronicity of generation  
in addition to total energy yields (Monforti et al., 2016; Bruckner et al., 2014; Bloomfield et al.,  
2016). Several validated timeseries of renewable generation based on reanalysis data are available  
to assess the power system operation (Pfenninger and Staffell, 2016; Staffell and Pfenninger, 2016;  
Gonzalez Aparicio et al., 2016). However, these data sets are restricted to current climatic conditions  
80 and might thus be misleading for long-term planning of the electricity system.

In this article we study the impact of climate change on the operation conditions for future fully-  
renewable power systems. We combine the analysis and simulation of power systems with high-  
resolution regional climate modeling results to quantify changes in wind power generation. We adopt  
a coarse scale view on the power system to uncover the large-scale impacts of climate change. The  
85 coarse scale perspective neglects details that are irrelevant for the balancing of demand with wind

generation such as supply of apparent power or different voltage levels in the grid. The focus of this study is to **In particular, we** address the potential of trans-national power transmission to cover regional balancing needs.

90 Our results reveal the sensitivity of fully-renewable power systems to climate change. They should not be mistaken with a forecast and rather be considered a thought experiment to assess potential risks and to answer the question: What happens to a fully-renewable electricity system if mitigation actions are ineffective or come too late?

## 2 Methods

### Modeling the operation of a fully-renewable power system under climate change

95 The power generated by wind turbines and solar photovoltaics is determined by the weather such that its variability crucially depends on atmospheric conditions (see, e.g. Bloomfield et al. (2016)). How does climate change affect these conditions and the challenges of system integration?

To assess the impact of strong climate change, we simulate the operation of a fully-renewable power system making use of high resolution climate projections. We use the EURO-CORDEX ensemble containing output of Global Circulation Models (GCMs) which has been dynamically down-  
100 scaled to a finer resolution (Jacob et al., 2014) to quantify changes in wind power generation. The ensemble contains five GCMs (HadGEM2-ES, CNRM-CM5, EC-EARTH, CM5A-MR and MPI-ESM-LR) which are all downscaled by the regional climate model RCA4 (Strandberg et al., 2015). The GCM output is part of the Climate Model Intercomparison Project Phase 5 (CMIP5) and pub-  
105 licly available (Taylor et al., 2011). We use near-surface wind speeds at  $0.11^\circ$  spatial and 3 h temporal resolution and hence capture intra-day effects. In the spirit of a sensitivity **analyses** analysis, we evaluate the representative concentration pathway RCP8.5. It describes atmospheric greenhouse gas concentrations following a business-as-usual strategy and leads to approximately  $4.3^\circ\text{C}$  warming at the end of the century as compared to pre-industrial values (Stocker et al., 2013). In view of inter-  
110 model spread and other uncertainties, a strong climate change scenario bears the advantage of high signal-to-noise ratios.

The approach used in this study is illustrated in Fig. 1. The climate data is used to calculate the aggregated wind power generation time series for each country in the interconnected European power grid (grey circles in Fig. 1a). Near-surface wind speeds are scaled up to hub height (80 m)  
115 based on a power law and a standard power curve is used to obtain the power generation of the wind turbines, both as in Tobin et al. (2016) (see also Supplementary Material A). The power curve assumes a cut-in velocity of 3.5 m/s, a rated velocity of 12 m/s and a cut-out velocity of 25 m/s. Wake losses are not accounted for. The country-wise aggregated wind power is obtained by summing the generation of 100 MW wind parks until the system is fully-renewable on average. The wind park  
120 size was chosen as a compromise between increasing turbine capacities (Wiser et al., 2016) and the need for a sufficient amount of distinct parks. Wind parks are deployed semi-randomly following the approach of Monforti et al. (2016). In order to single out climate change induced alterations, we fix the technological parameters such as hub heights or turbine efficiencies, and we do not account for changes in the consumption such as load shifting or sector coupling throughout the 21st century.  
125 Tests including validated historical PV timeseries (Pfenninger and Staffell, 2016) reveal that the inclusion of PV does not change the overall results (see Supplement B). For the sake of simplicity, we thus decide to restrict the analysis to wind-driven power systems in this paper.

Wind power generation is strongly fluctuating on various time scales as shown in Fig. 1c. In periods of scarcity, energy has to be imported from other countries or generated from local dispatchable power plants. We refer to the latter as backup energy. In the situation depicted in Fig. 1a, scarcity in Southern Europe can mainly be compensated by imports from Northern Europe. Trans-national balancing of this kind often requires large transmission capacities. Moreover, the import of electric energy requires a respective exporter which has a surplus at the same time. Backup **needs** energy in future renewable power systems **are** is thus essentially determined by the temporal and spatial heterogeneity of wind and solar power throughout the system.

In addition to enhanced spatial balancing via im- and exports, an extension of storage facilities will reduce backup **needs** energy (Rasmussen et al., 2012). But storage assets are more costly than grid expansion (Schlachtberger et al., 2017; Brown et al., 2016). Since a cost-optimal solution will thus favor grid expansion, we focus on spatial effects and trans-national balancing. An assessment of climate change effects on storage following a similar approach is presented by Weber et al. (2017).

To quantify backup **needs** energy, we adopt a coarse-scale view of the transmission system (see, e.g. Rodriguez et al. (2015a, 2014)). We consider each country  $i$  to be a node in the European transmission network and define a nodal mismatch for each point in time  $t = 1, 2, \dots$  as

$$M_i(t) = P_i(t) - D_i(t), \quad (1)$$

where  $P_i(t)$  is intermittent renewable generation and  $D_i(t)$  is the load (here: hourly data for 2015 from European Network of Transmission System Operators for Electricity (ENTSO-E) averaged over 3h timesteps (European Network of Transmission System Operators for Electricity, 2015)). The assumption of a fully-renewable system means that all countries generate as much electricity as needed on average ( $\int_{t_s}^{t_e} M_i(t) dt = 0$ ). Furthermore, we **We** assume all countries to run a loss-free and unlimited transmission network within their borders.

If a country has a negative mismatch ( $M_i < 0$ , red circles in Fig. 1d), it tries to import energy. If it has a positive mismatch ( $M_i > 0$ , green circles in Fig. 1d), it tries to export energy. For each country  $i$  the power balance must be satisfied:

$$M_i(t) + B_i(t) + F_i(t) = C_i(t), \quad (2)$$

The mismatch  $M_i$  can be compensated either by power generation from conventional backup power plants ( $B_i \geq 0$ ), the curtailment of renewable power generation ( $C_i \geq 0$ ) or by imports ( $F_i > 0$ ) or exports ( $F_i < 0$ ). To utilize renewable generation in an optimal way, countries will first try to balance power using im- and exports. However, a perfect balancing of all nodes is impossible if there is a continent-wise shortage or overproduction. Furthermore, cross-boarder flows along lines are bound by the directional Net Transfer Capacities (NTCs; see Supplement A for details), which



may also impede balancing for some nodes. Power balance must then be satisfied by local means: In the case of a shortage, power must be backed up by conventional generators ( $B_i > 0$ ). where  $F_i$  represents imports ( $F_i > 0$ ) or exports ( $F_i < 0$ ) to/from country  $i$ . Cross-boarder flows along lines are bound by the directional Net Transfer Capacities (NTCs; see Supplement A for details). If overall  
165 shortage or line limits prohibit sufficient imports, power can also be backed up locally ( $B_i \geq 0$ ). Similarly, if excess power can not be exported, it has to be curtailed ( $C_i \geq 0$ ). We recognize that the technical details of backup generation often matter for implementation (Schlachtberger et al., 2016) but we focus on gross electricity needs in this study.

For each time step we determine the system operation which minimizes backup power and thus  
170 macroeconomic costs as well as greenhouse gas emissions. To assess the impact of climate change, we compare future backup energy needs to historical values. Time frames of 20 year duration are chosen to account for natural climatic variability (see Table 1). Time frames are chosen to contain 20 years in order to capture natural variability of the climate system on a multi-year timescale while still ensuring that elapsed time between periods is long enough to consider them distinctly (see Table  
175 1). Since GCMs do not reproduce natural variations synchronously (Farneti, 2017), robust signals found in the ensemble are very unlikely to be rooted in natural variations with a recurrence time of a couple of decades (such as the Atlantic Meridional Oscillation or the North Atlantic Oscillation; see Peings and Magnusdottir (2014) for a discussion of their role in mediating atmospheric conditions). The backup energy  $E_B$  per period is defined as the sum over all backup powers in a given period:

$$180 \quad E_B(\text{period}) = \sum_{t \in \text{period}} \min_i \sum_i B_i(t), \quad (3)$$

such that Eq. (2) is satisfied for all countries  $i$  and the line limits are respected.

The European amount of backup energy is identical to the amount of curtailment over a full period. This is a direct consequence of the assumptions made and can be formally derived by summing Eq. 2 over all countries and integrating over an entire period. Since  $\int_{t_s}^{t_e} M_i(t) dt = 0$  (each country is fully  
185 renewable on average) and  $\sum_i F_i = 0$  (all imports to one country  $F_j = c$  are exports from another  $F_k = -c$ ) it follows that:

$$\int_{t_s}^{t_e} \sum_i B_i(t) dt = \int_{t_s}^{t_e} \sum_i C_i(t) dt. \quad (4)$$

A change of the backup energy thus directly implies a change in total curtailment.

We use climate model ensembles to account for model uncertainties. Interpreting the ensemble  
190 output by means of the ensemble-mean can be misleading as a single model might dominate the ensemble. In such cases, the model-mean would be in disarray with the majority of models and hence would not be representative for the ensemble. We thus assess the robustness of changes by means of inter-model agreement. We label a signal *robust* if all models agree on the sign of change

and use *high agreement* if all but one model agree. In the evaluation of the large CMIP5 ensemble we adopt language defined for the latest IPCC report and label a change *likely* if at least 66% of models agree (Mastrandrea et al., 2010).

A variety of studies have analyzed transmission and backup **needs energy** in future renewable power systems and cost-optimal transition pathways in a similar way (Rodriguez et al., 2015a, 2014, 2015b; Becker et al., 2014; Rasmussen et al., 2012; Schlachtberger et al., 2016; Hagspiel et al., 2014). But the potentially crucial role of changes in climatic conditions have not yet been assessed in this context. The remainder of this article focuses on the quantification of impacts to the power system, a correlation analysis of the wind resource and an assessment of the larger CMIP5 ensemble to contextualize our findings.

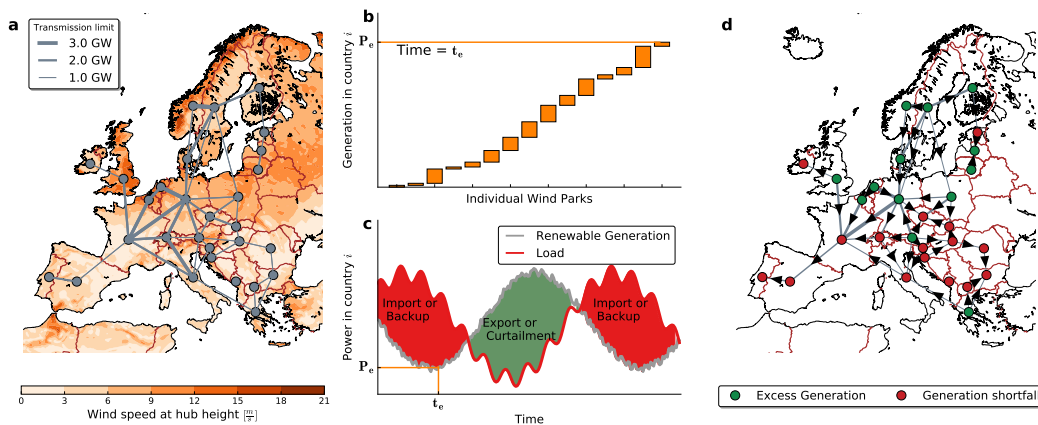

**Figure 1. Approach of the study.**

**a)** Wind fields from high-resolution climate models and the 2010/2011 Net Transfer Capacities are used as input to the model. **b)** The wind speeds are first translated into generation of individual wind parks using local wind fields. **In a second step the generation is and then aggregated to a national level for each country.** **c)** In combination with country-specific load data, the nodal mismatch for every country and timestep is computed. If generation exceeds the load (green area), countries can export energy until lines reach their transmission capacity. Remaining energy has to be curtailed (dumped). If generation is lower than load, electricity is imported. If importing is not an option due to transmission limits or lack of available excess energy in other countries, backup energy has to be provided by dispatchable power plants (e.g. gas turbines or other thermoelectric plants). **d)** We assume a controllable European power transmission grid. A minimization of the total backup energy of all countries then yields a flow pattern in Europe. **In the shown case, strong winds over the North Sea lead to high generation in this region while there is little generation in the southern part of Europe. Energy is hence mainly transported from the North Sea region to Southern Europe and the high transmission needs lead to an operation of almost all lines at their maximum.**

**Table 1.** Periods are chosen to contain 20 years in order to capture natural variability of the climate system on a multi-year timescale while still ensuring that elapsed time between periods is long enough to consider them distinctly. Since GCMs do not reproduce natural variations synchronously (Farneti, 2017), robust signals found in the ensemble are very unlikely to be rooted in natural variations with a recurrence time of a couple of decades (such as the Atlantic Meridional Oscillation or the North Atlantic Oscillation; see Peings and Magnúsdóttir (2014) for a discussion of their role in mediating atmospheric conditions). Periods used in this study. The reference period ref ends before 2005 because GCMs in CMIP5 are driven by historic emissions only until this date and follow different representative concentration scenarios afterwards.

| <b>Period name</b> | $t_{start}$ | $t_{end}$ |
|--------------------|-------------|-----------|
| ref                | 1985        | 2004      |
| midc               | 2040        | 2059      |
| endc               | 2080        | 2099      |

### 3 Results and Discussion

#### 205 3.1 Energy: Increasing backup needs energy

A cost-efficient way of power balancing is given by trans-national im- and exports. Remarkably, we find that strong climate change impedes the potential of this balancing measure in most of Europe (cf. Fig. 2). We report that backup needs energy in Europe increases under strong climate change by the end of the century. This finding is robust across all EURO-CORDEX ensemble members.

210 The increase implies more excess energy and also more curtailment since we consider a scenario where 100% of electricity is generated from renewables on average. Since we consider a scenario where 100% of electricity is generated from renewables on average, an increase of backup energy is accompanied by an increase of excess energy which has to be curtailed.

To uncover this effect we simulate backup needs energy for different scenarios of the develop-  
215 ment of the transnational grid quantified by the Net Transfer Capacities (NTCs). We allow for a homogeneous scaling of transmission capacity by multiplying NTCs with a factor  $\alpha$ . Without any grid, approximately 45 % of the wind-energy is produced at the wrong time and thus has to be curtailed and backed up later on. A strong grid extension ( $\alpha \gg 1$ ) clearly reduces total balancing needs backup energy to about 27% (cf. Fig. 2a). However, all models report an increase of backup energy  
220 at the end of the century. The the effect of climate change is almost independent of a grid extension: The absolute increase of backup energy until end of century is largely independent of the expansion coefficient  $\alpha$  for three out of five models (cf. Fig. Fig. 2b). Hence, the relative increase of backup needs energy paradoxically becomes even more pronounced for a strongly interconnected Europe (cf. Fig. Fig. 2c). Highly connected systems can suffer from an increase of backup needs energy of  
225 up to 7%. There is considerable inter-model spread regarding the magnitude of change which varies by up to one order of magnitude depending on the climate model (see Fig. 2b,  $\alpha = \infty$ ). In particular, changes for CNRM are generally weak and HadGEM2 features only a slight overall increase with grid expansion. But remarkably, all models agree on the sign of change at the end of the century such that we consider the direction of change very likely.

230 In conclusion, we find that the effectiveness of transnational balancing decreases due to climate change. This decrease is due to more homogeneous wind generation as we will show in the climate section of this paper. Moreover, a control simulation including PV generation from Pfenninger and Staffell (2016) yields similar results although the magnitude of change is reduced by roughly a factor of 2 and only 4 out of 5 models agree (cf. Supplementary B). Results are barely sensitive to changes  
235 in the load timeseries as an assessment using constant loads reveals reveals (cf. Supplementary C).

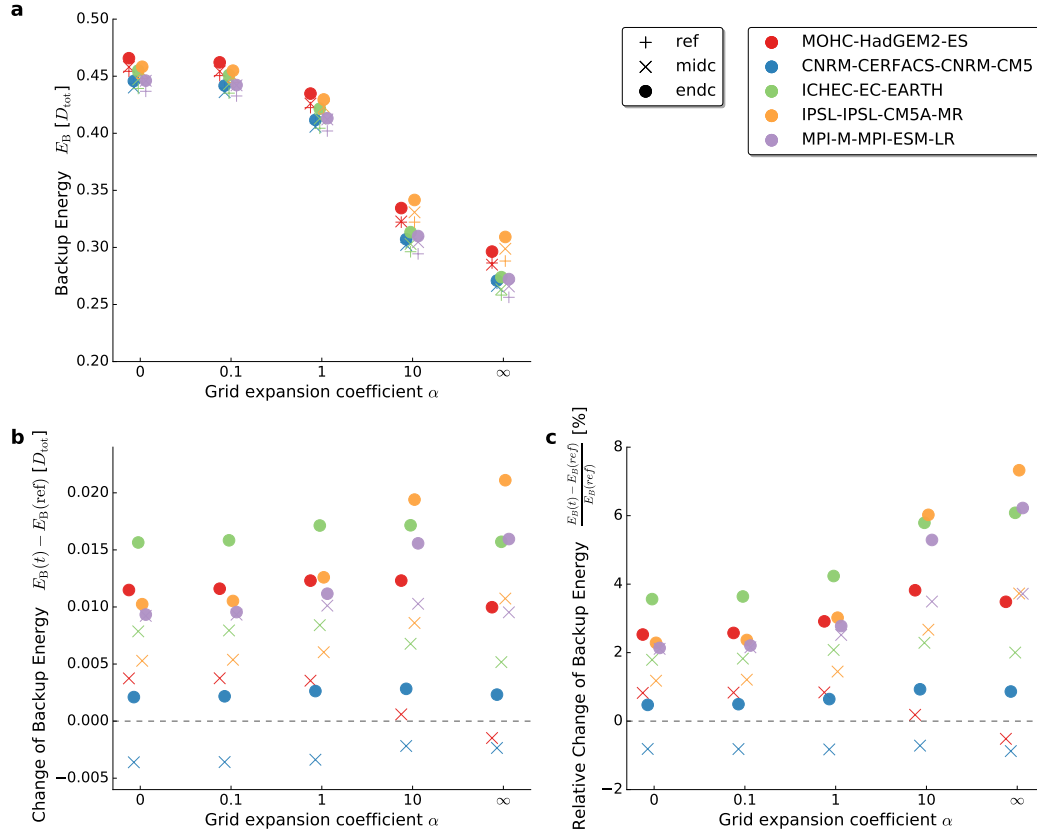

**Figure 2. The impact of climate change on backup energy under different grid expansion scenarios.**

Different realizations of the European inter-state grid expansion are given by the grid expansion coefficient  $\alpha$ . While  $\alpha = 0$  denotes the isolated case without inter-country transmission network,  $\alpha = 1$  reproduces the configuration as of today and  $\alpha = \infty$  represents unlimited European transmission. Different markers refer to distinct 20 year time periods (see Table 1), colors denote different climate models. **a)** Backup energy as a function of grid expansion expressed in units of the total European load  $D_{tot} = \int \sum_i D_i(t) dt$ . **b)** Absolute change of backup energy by the end of the century. **c)** Relative change of backup energy by the end of the century.

**a)** Backup energy decreases monotonously with grid expansion. Without any grid, approximately 45 % of the wind-energy is produced at the wrong time and thus has to be curtailed and backed up later on. This number can be theoretically reduced to roughly 27% by grid extension.

**b)** All models report an increase of backup energy at the end of the century. This increase is approximately independent of the grid expansion for 3/5 models. For the other two models the increase is even more pronounced for a strongly interconnected grid (large  $\alpha$ ).

**c)** The relative change of backup energy features a steeper increase with grid expansion as compared to **b)**. Highly connected systems can suffer from an increase of backup needs energy of up to 7%.

### 3.1.1 Spatial distribution of Mismatch contributions

To obtain a more detailed view, we evaluate trans-national balancing potentials separately for each country. We calculate the likeliness that a given country has a local scarcity ( $M_i < 0$ ) while Europe as a whole suffers from a lack of generation ( $\sum_i M_i < 0$ ). This corresponds to events where a country would favor importing electricity but can not due to a continent-wide scarcity. These events require conventional backup even in the case of unlimited transmission infrastructures and thus give a lower bound for backup **needs energy**. The approach allows us to identify those countries which are most responsible for overall scarcity. Mathematically speaking, we restrict our analysis to timesteps  $T_i$  with local and Europe-wide scarcity:

$$T_i = \left\{ t : \left( \sum_j M_j(t) < 0 \text{ and } M_i(t) < 0 \right) \right\}. \quad (5)$$

The negative mismatch contribution occurrence  $\nu_i$  corresponds to the joint probability of country  $i$  and Europe experiencing generation shortfall at the same time:

$$\nu_i = \frac{\sum_{t \in T_i} 1}{N_T}, \quad (6)$$

where  $N_T$  is the number of timesteps. We define the annual energy that is lacking (i.e., **generation shortfall**) in country  $i$  during European scarcity as

$$L_i = \frac{\sum_{t \in T_i} |M_i(t)|}{20y}, \quad (7)$$

where we chose the absolute value of  $M_i$  for convenience of interpretation.  $L_i$  is given in TWh/y. A high value of  $L_i$  characterizes a country which would favor to import a lot of energy during European scarcity whereas a low value of  $L_i$  indicates a country whose generation shortfall can often be balanced by imports. In order to compare values of  $L_i$  with loads, we provide country values for  $D_i$  in the Supplementary Material E. The European sum is  $\sum_i D_i \approx 3100$  TWh.

Values for  $\nu$  and  $L$  during the reference period are shown in Fig. 3a,b. Large consumers like Germany and France are also the dominant contributors to European scarcity in terms of missing energy (cf. Fig. 3a). The German contribution corresponds to approximately 8% of the European annual load of 3100 TWh. However, the role of these countries, for example, in comparison to Eastern Europe or Benelux, is less pronounced if only the occurrence of negative mismatch events  $\nu$  is considered (cf. Fig. 3b). The reason for their strong impact on  $L$  is thus primarily rooted in the high absolute values of their mismatches rather than their frequency. Moreover, a large consumer also has a bigger influence on the Europe-wide mismatches which implies that the conditions in Eq. (5) are not independent. For example, the European mismatch can be negative because of an elevated

German mismatch and in such a situation a high contribution to  $L$  would be observed. Interestingly, there is considerable spread regarding  $\nu$  in different countries (Fig. 3b). Greece and Norway contribute the least often to European scarcity (less than 40%) while Central Europe contributes around 50 - 60 % of the time.

270 Next, we focus on changes until the end of the 21st century

$$\Delta\nu_i = \nu_i|_{\text{endc}} - \nu_i|_{\text{ref}} \text{ and } \Delta L_i = L_i|_{\text{endc}} - L_i|_{\text{ref}}. \quad (8)$$

In France, Benelux, Scandinavia, the British Isles and most countries in Central Europe the negative mismatch contribution occurrence  $\nu$  and the respective negative energy contribution  $L$  increase (cf. Fig. 3c,d). In these countries it becomes more likely that a Europe-wide scarcity coincides with  
275 a local scarcity and the amount of required backup energy increases. In turn, these countries can not alleviate the overall shortage by exporting excess generation. This points to a stronger homogeneity of wind power generation in Central Europe which is discussed in more detail below. An increase of the occurrence  $\nu$  can also be observed for Eastern and South Eastern Europe, excluding Greece, with high inter-model agreement (cf. Fig. 3d). However, these increases are weak in terms of energy  
280 contributions (cf. Fig. 3c).

An opposite trend is observed in Spain, where transnational balancing is facilitated as negative mismatch contributions  $L$  become weaker (cf. Fig. 3c). At the same time, models generally disagree on the sign of change regarding  $\Delta\nu$  (cf. Fig. 3d). Combined, this indicates weaker but not less frequent negative contributions of Spain. Moreover, Greece shows favourable changes for the European  
285 system in terms of energy contributions and occurrences with a high inter-model agreement (cf. Fig. 3c,d). This finding is particularly interesting as Grams et al. (2017) show that a combination of wind parks allocated in the North Sea and the Balkans allows to reduce volatility substantially under current climatic conditions. Based on our results, this positive effect from incorporating the Balkans would further be enhanced under strong climate change.

290 We stress that our findings do not refute the efficiency of transmission grid expansions in general. In any case backup **needs energy** decreases monotonously with the grid expansion, but the magnitude of the decrease is subject to climatic conditions. Furthermore, we assume a homogeneous expansion of the grid, although an optimal system design will probably lead to heterogeneous grid expansions and heterogeneous allocations of generation capacities. Our results suggest that such an optimal  
295 system will include stronger interconnections to Spain and Greece to reduce backup **needs energy**. Also on a country level, certain extensions can be incentivized while others are downgraded. For instance, for France it can become more favorable to extend the connections to Spain rather than to Germany (cf. Fig 3c). Despite that and in light of regulatory and strong social acceptance issues regarding grid extensions (Battaglini et al., 2012), we consider a future grid which resembles the  
300 current one in its fundamental characteristics a reasonable first guess.

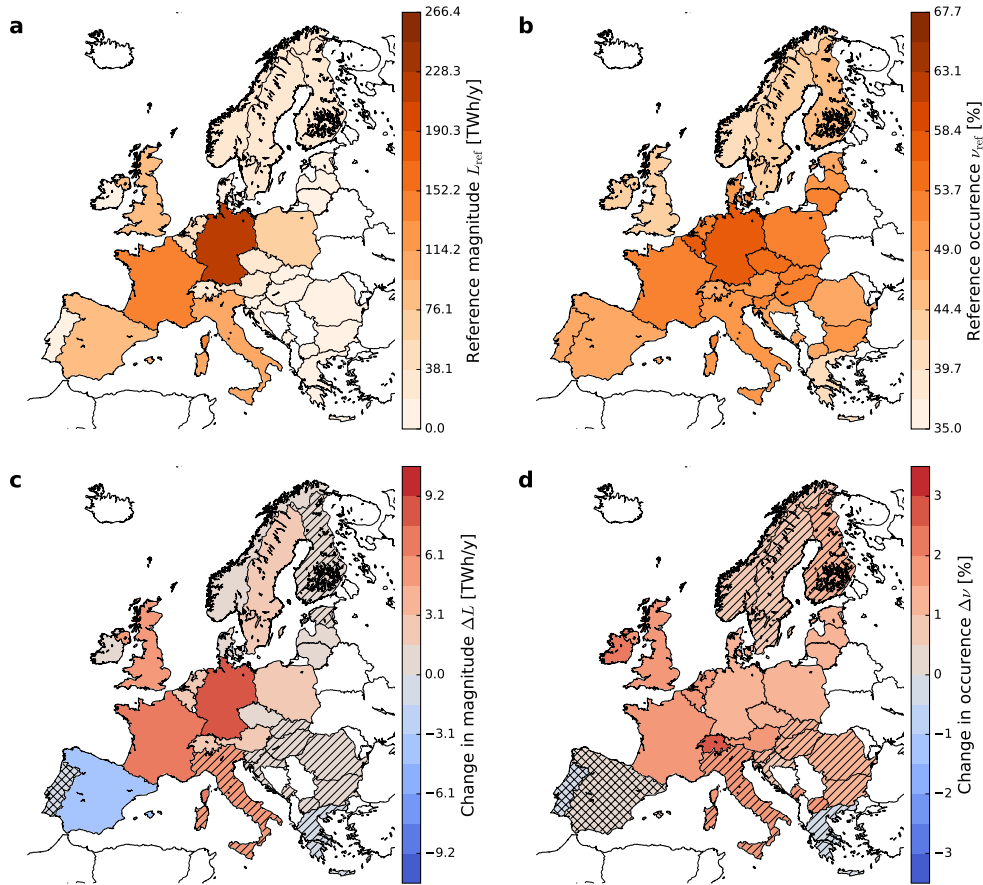

**Figure 3. Country contributions in times of overall and local generation shortfall and their change until end of century.** Values denote the inter-model mean. Hatches indicate inter-model agreement as follows: no hatches indicate perfect agreement on sign of change, striped: 4 out of 5 models agree, crosses: less than 4 agree. **a)** Lacking Energy  $L_{ref}$  during local and overall scarcity in the reference period (see Eq. (7)). **b)** Simultaneous occurrence of local and overall generation shortfall  $\nu_{ref}$  (see Eq. 6). **c) & d)** show changes of the quantities given in **a) & b)** until end of century (see Eqs. 8). Red colours denote unfavourable changes (stronger or more frequent contribution of a country to overall scarcity) while blue colors denote favourable changes.



### 3.2 Climate: Increasing correlations of the wind resource

As reported above, we find an increase of backup **needs energy** due to strong climate change in a wind-powered electricity system. This increase is solely rooted in changes of the wind resource since all other parameters are kept constant. **In order to single out climate change induced alterations, we**  
305 **fix the technological parameters such as hub heights or turbine efficiencies, and we do not account for changes in the consumption such as load shifting or sector coupling throughout the 21st century.**

For the identification of changes in the spatial wind patterns, we perform a correlation analysis over 20 year time-spans of wind speeds (see Table 1). We use Pearson correlation on the highest spatial scale, i.e. we correlate every grid point to all others instead of aggregating the wind fields  
310 first. Hence, the full spatial detail of the downscaled climate data is taken into consideration. In order to visualize results, correlation values are averaged on country level in the next step. To highlight long-term trends, we only show correlation changes between 2080-2099 (endc) and 1985-2004 (ref):

$$\Delta R_{\text{endc}}(A,B) = R_{\text{endc}}(A,B) - R_{\text{ref}}(A,B), \quad (9)$$

where  $R_{\text{period}}(A,B)$  denotes the average of all point-to-point correlations between country A and  
315 country B in a given period. The computation is repeated for all possible combinations  $(A, B)$ . We calculate  $\Delta R_{\text{endc}}(A,B)$  for each climate model separately and show the model mean if not stated otherwise.

To reveal general patterns, we first consider the average correlation change of a fixed country A by averaging Eq. (9) over all countries B excluding A (cf. Fig. 4). There is a general tendency towards  
320 higher correlations of wind speeds for Central Europe in the ensemble mean. This change is most pronounced in Germany, Switzerland, Benelux and Ireland. Decreasing correlations only occur at the fringes of the continent and they are strongest in Portugal and Greece. Positive correlation changes occur in most countries and the maximum positive change is approximately three times larger in magnitude than the maximum negative change. Interestingly, the overall pattern is similar to the  
325 mismatch contribution analysis (cf. Fig. 3). This similarity is not a trivial finding since the mismatch contribution analysis accounts for the non-linear turbine power curve and the collective behaviour of the entire electricity grid while the correlation analysis is solely based on wind speeds. Summarizing, we find more homogeneous wind conditions over most of the continent while the fringes decouple slightly. Results for mid century are weaker but clearly similar (cf. Supplementary Fig. 12).

330 Assessing pairwise correlation changes between countries, we find that the correlation increase over Central Europe has at least a high agreement in the EURO-CORDEX ensemble (cf. Fig. 5). Some country combinations (e.g. DE-CZ, FR-CZ, BE-GB, FR-NL) even show robust trends. For example, in Germany the correlations to all neighbour countries plus the British Isles and Eastern Europe increase with high agreement. The importance of this finding is strengthened by the fact that  
335 Central Europe plays an important role for the power system: Germany, France, Great Britain, Poland

and Benelux account for more than half of the European load. Correlations between Germany and Greece decrease with high model agreement. In contrast, changes between Germany and the Iberian Peninsula, Italy and Norway are uncertain.

340 The decoupling of Portugal and Greece which is found in the aggregated plot (Fig. 4) is only robust in a few country combinations and models disagree regarding some important pairs (e.g. PT-DE, PT-FR, PT-GB or GR-IT, GR-UK or ES-FR, ES-GE). The uncertainty with respect to the correlation changes between these countries is thus high.

345 However, a robust trend is found in Scandinavia, where Norway, Finland and Sweden become higher correlated. This change partly also holds for the Baltic region. At the same time Scandinavia decouples robustly from some parts of Southern Europe (e.g. SE-GR, NO-ES). In the context of large scale European grid expansions, these alterations might enhance the value of high-voltage direct current (HVDC) lines between these distinct regions.

350 Correlation increases in Scandinavia are also robust in the middle of the century (cf. Supplementary Fig. 13). However, inter-model agreement for correlation increases in Central Europe is lower albeit the overall pattern is still conceivable. The decoupling of Portugal and Greece can be seen in the inter-model mean while agreement across models is rare.

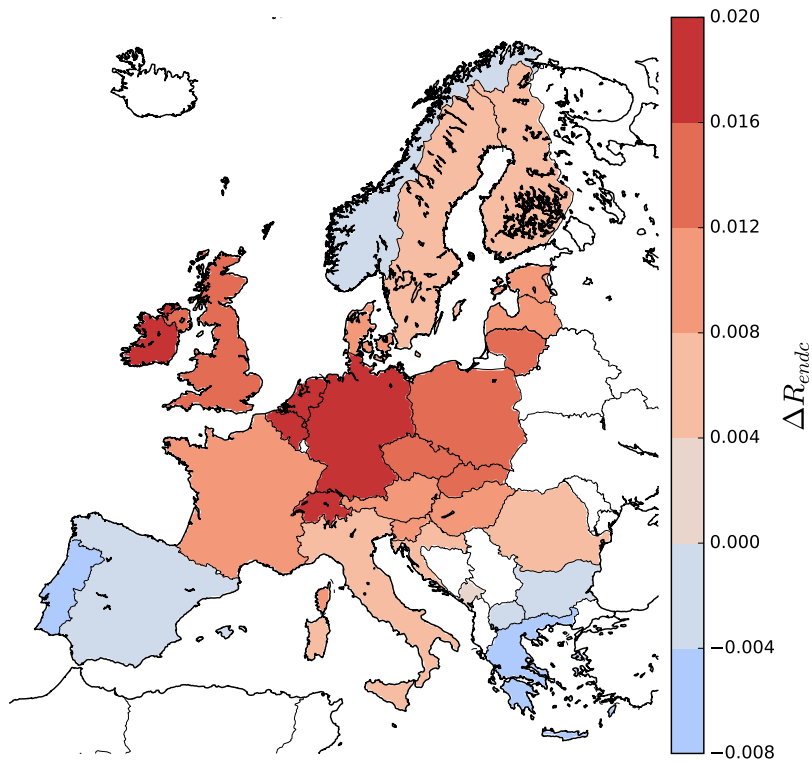

**Figure 4. Correlation changes of wind timeseries averaged over all models (difference between end of century and reference correlations). An increase of spatial correlation over most of Europe is found which hints to more homogeneous wind conditions. This increase is most pronounced in the Central European region. However, at the margins of the continent correlation decreases are found. A more detailed assessment, which in particular addresses inter-model spread, is shown in Fig. 5.**

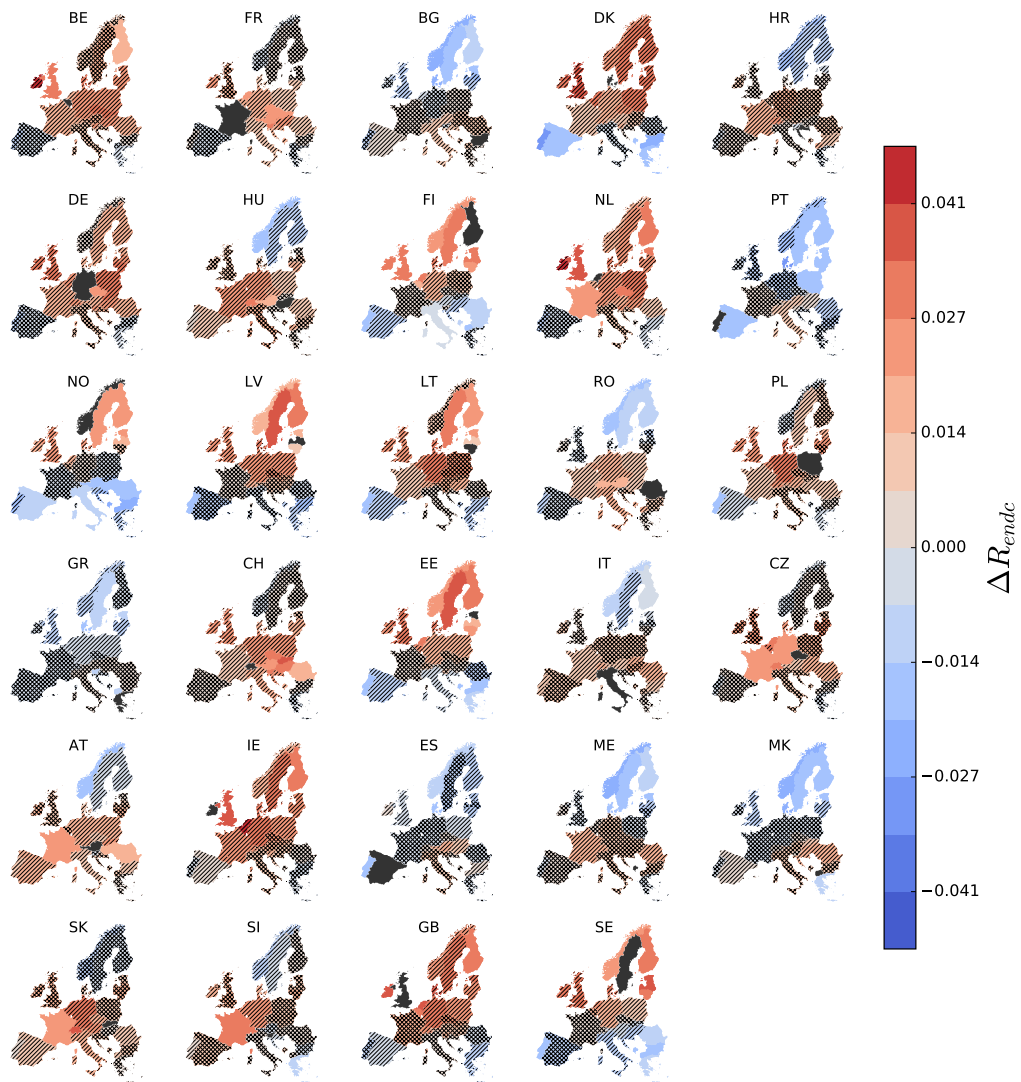

**Figure 5. Country-specific change of wind speed correlations at the end of the 21st century including inter-model agreement.** Colors denote the model-average correlation change of a country to the reference country (highlighted in black and given in the respective heading). Hatches indicate inter-model agreement as follows: no hatches indicate perfect agreement on sign of change, striped: 4 out of 5 models agree, crosses: less than 4 agree.

### 3.3 Climate: Complementing EURO-CORDEX with CMIP5 using Circulation Weather Types

The EURO-CORDEX dataset includes only a 5-member subset of all CMIP5 GCMs and might thus not be representative for the entire CMIP5 ensemble. Moreover, subgroups of GCMs can be  
355 biased in the same way since they did not develop separately, but along the same lines. The most drastic example is the sharing of code by CNRM and EC-EARTH, which are both part of the EURO-CORDEX ensemble and run the same atmosphere module (Knutti et al., 2013).

Uncertainty in climate projections has been argued to stem from three main sources: (1) natural variability, (2) model uncertainty and (3) scenario uncertainty (Hawkins and Sutton, 2009). In some  
360 situations the choice of initial conditions also contributes substantially (Hawkins et al., 2016). We neglect scenario uncertainty by design of this study since we only focus on the sensitivity to strong climate change (RCP8.5). As the importance of natural variability decreases with the time intervals averaged over, model uncertainty is likely to be the dominant source of uncertainty here.

In order to rule out the possibility that our findings are biased due to the (arbitrary) choice of  
365 GCMs that were downscaled for EURO-CORDEX, we follow a statistical-dynamical approach which was developed by Reyers et al. (2015, 2016) to downscale a large CMIP5 ensemble for wind energy applications. This approach is based on a circulation weather type (CWT) classification methodology (Jones et al., 1993). Daily mean sea level pressure (MSLP) values at 16 GCM grid points around a central point located in Germany are used to assign the near-surface atmospheric  
370 flow over Europe to either a directional flow (north, northeast, east, ...) and/or a rotational flow (anti-cyclonic, cyclonic). Aside from the direction of the atmospheric flow a  $f$ -parameter is calculated, which is representative for the instantaneous pressure gradient and thus for the general wind speed conditions over Germany and the surrounding countries.:

$$f = \sqrt{dP_z^2 + dP_m^2}, \quad (10)$$

375 where  $dP_z$  is the mean pressure gradient in East-West direction (zonal component) and  $dP_m$  is the mean pressure gradient in North-South direction (meridional component).  $f$ -parameters from below 5 hPa per 1000 km (weak MSLP gradient and thus low wind speed conditions) up to 45 hPa per 1000 km (strong MSLP gradients and thus high wind speed conditions) were found. Reyers et al. (2016) demonstrated that such a CWT classification provides a suitable and effective basis for wind  
380 energy applications on the regional scale and therefore enables the consideration of a large CMIP5 ensemble in future projections.

Analyzing the five individual GCMs contributing to the EURO-CORDEX ensemble reveals a link between the CWTs and the backup energy needs derived from dynamically downscaled data (see Eqs. 1, 2, 3). We find that backup needs energy decreases monotonously with increasing  $f$ -  
385 parameter (cf. Fig. 6a,b). All models in the EURO-CORDEX ensemble agree on this result which is also physically plausible as the pressure gradient drives the atmospheric circulation. This statement holds for Germany and its neighbors and for Europe as a whole. We see this as evidence that the

CWT analyses in this particular case can be applied to the entire continent in the sense that the  $f$ -parameter is a reasonable proxy for the European backup **need energy**.

390 The majority of CMIP5 models (16 out of 22) predicts an increase of events with low  $f$ -parameter by the end of the century (cf. Fig. 6c). Following the likelihood classification developed for the latest IPCC report (Mastrandrea et al., 2010), it is thus *likely* that low  $f$ -parameters become more abundant. This trend originates mainly from more frequent anticyclonic pressure configurations (cf. Fig. 7). For this CWT, spatial homogeneity of the wind resource is higher as compared to all other CWTs  
395 (cf. Supplementary Fig. 14). In such a homogeneous situation, it is plausible that backup **needs are energy is** elevated since countries are more likely to experience shortfall of generation simultaneously. In contrast, medium ( $10 \leq f[hPa/1000km] \leq 15$ ) and high ( $15 \leq f[hPa/1000km] \leq 20$ )  $f$ -parameters are *likely* to occur less frequent since 17 models agree on these signals. We thus conclude that the majority of CMIP5 models agrees with the main finding of increasing backup **needs**  
400 **energy** .

The larger CMIP5 ensemble also allows for an assessment of the EURO-CORDEX ensemble's input data. We report that the GCMs contributing to EURO-CORDEX are within the spread of the remaining CMIP5 ensemble (exception HadGEM for very strong  $f$ -parameters) and are thus generally representative for the larger ensemble (see Fig. 6). However, they also show comparably  
405 strong changes in the occurrence of specific  $f$ -parameters. The CMIP5 overall projection regarding backup **needs energy** might thus be lower than results reported in this paper. In order to test this speculative hypothesis, a consistent downscaling of all CMIP5 models would be necessary, which is far beyond the scope of this article but should be tackled in future works.

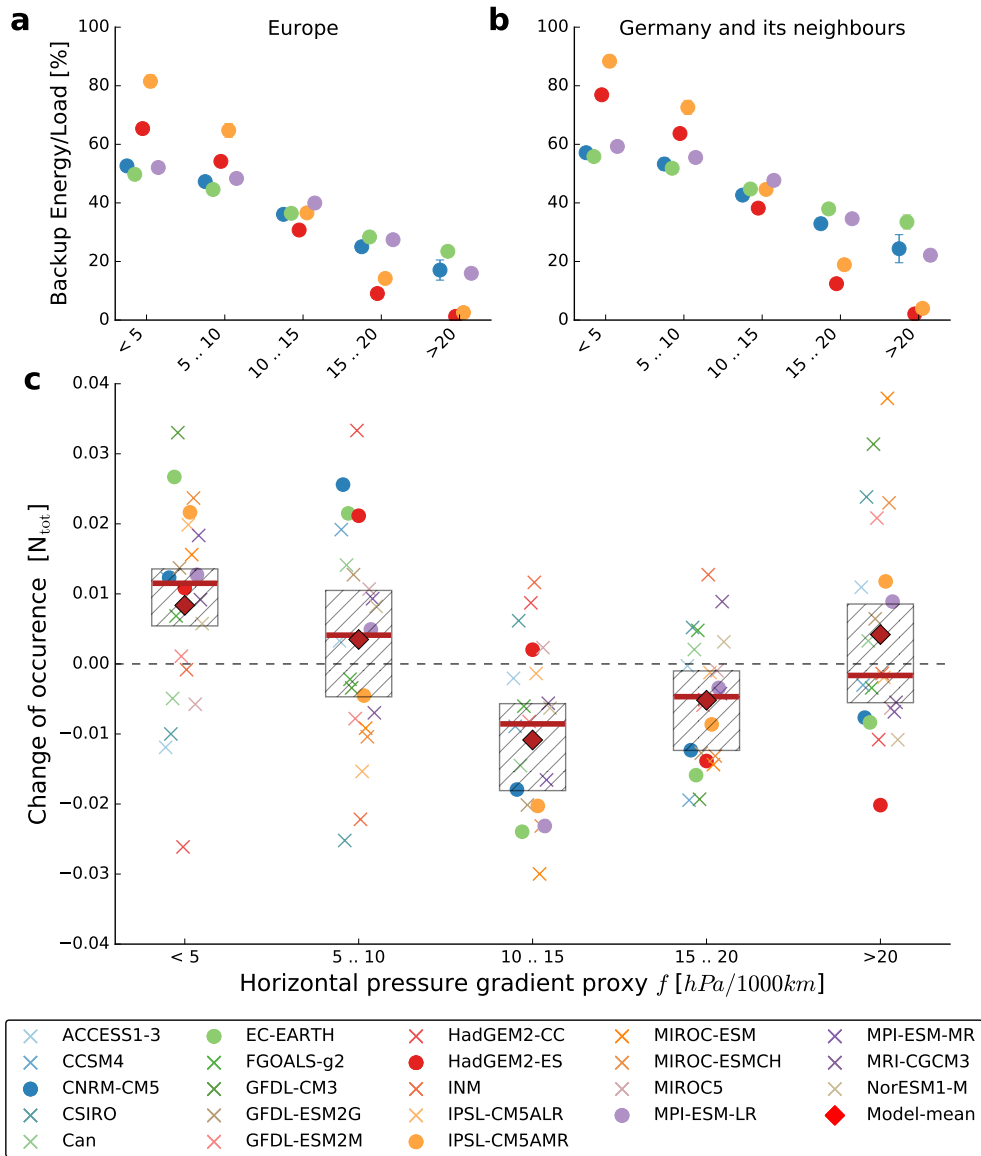

**Figure 6. Backup energy and change of occurrence as a function of the  $f$ -parameter. a) Monotonous decrease of backup energy with increasing  $f$ -parameter** Backup energy versus  $f$ -parameter for the entire domain. Circles denote the mean over the three considered periods for each model and errorbars indicate the standard deviation thereof. Errorbars are, however, most often smaller than the circle size. **b) The same decline is found if only Germany plus its neighbor countries are considered.** Same as a) but restricted to Germany and its neighbors **c) Change of occurrence of different  $f$ -parameters.** The change of occurrence is computed as the difference between end of century and the reference period and is given in units of the total number of timesteps  $N_{\text{tot}}$ . Low  $f$ -parameters become more frequent by the end of the century while medium to high  $f$ -parameters occur less often. There is considerable inter-model spread, however 16/22 agree on an increase in frequency of very low pressure events ( $f < 5$ ) and 17/22 agree on a decrease of medium pressure events ( $10 \leq f < 15$ ). Red diamonds denote the ensemble mean, red lines the ensemble median and hatched boxes indicate the 33rd to 67th percentile. If a box lies completely above/below zero, the sign of the change can be considered as likely (Mastrandrea et al., 2010).

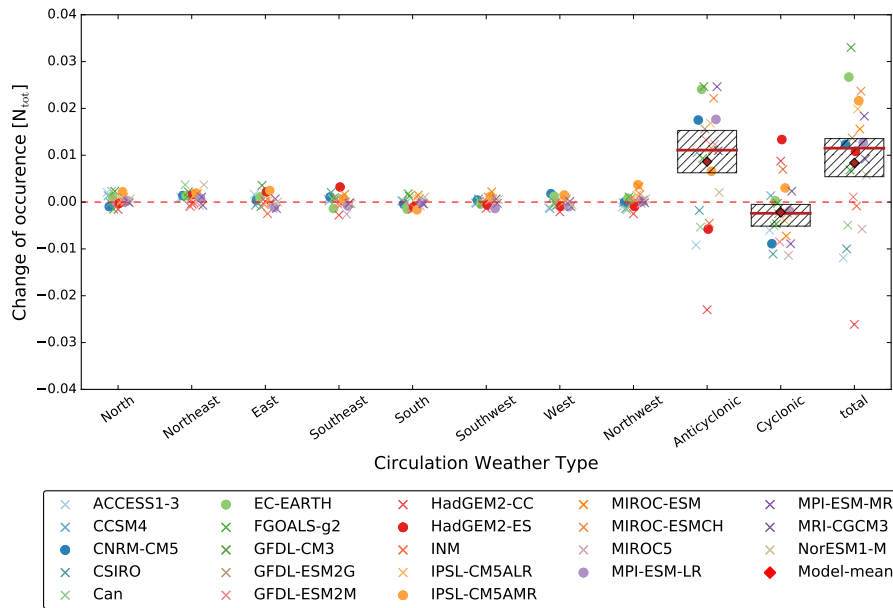

**Figure 7. Changes of relative occurrence of primary CWTs with low  $f$ -parameters ( $f \leq 5hPa/1000km$ ).** Changes are differences in occurrence between end of century and the reference period and are given in units of the total number of timesteps  $N_{tot}$ . Boxes indicate the 33rd to 67th percentile and are only shown if changes are substantial. A majority of models projects more weak anticyclones while cyclonic CWTs occur less often (both findings are likely). In total, most models project an overall increase of the occurrence of CWTs with low  $f$ -parameters. This increase is dominantly rooted in more frequent anticyclonic CWTs. Red diamonds denote the ensemble mean and red lines denote the ensemble median.



## 4 Conclusions

410 A future highly-renewable electricity system will be governed by weather conditions. If mankind fails to reduce carbon emissions fast, climate change will impede the operation of a wind-driven system in Europe. This conclusion is based on three separate lines of evidence.

1. A coarse-scale electricity model fed with EURO-CORDEX climate data shows robust increases of backup **needs energy**.
- 415 2. Spatial correlations in wind timeseries in EURO-CORDEX data across Central Europe are found to increase. Countries are thus more likely to experience generation shortfall simultaneously.
3. Building upon a statistical-dynamical downscaling technique and a 22-member CMIP5 ensemble we find a likely increase of Circulation Weather Types with low  $f$ -parameters. They  
420 are associated with low Europe-wide wind generation.

It has to be stressed that results are for the end of the 21st century and based on a strong climate change scenario (RCP8.5). They should be thought of as a sensitivity test. **Moreover, While** the increases of backup energy are robust **yet , they are also** restricted to relative increases of **87%** (cf. Fig. 2). A fully-renewable electricity system will hence not become unfeasible due to catastrophic  
425 changes.

In the emerging field of linking energy and climate research, many additional questions are to be addressed in order to deliver a more holistic assessment. We simulated a wind-driven electricity system and performed a control simulation with a fixed share of PV. Timeseries for the latter were taken from a validated dataset based on reanalysis data (Pfenninger and Staffell, 2016). Ideally, future  
430 works would assess the combined effects of climate change on wind and solar generation. They could also include concentrated solar power since this technology bears advantages for system integration (Pfenninger et al., 2014). Load-shifting, sector-coupling and storage are further key words for more detailed assessments.

In terms of climate modeling output, a larger high-resolution ensemble is desirable which in particular contains multiple Regional Climate Models (RCMs). The next generation of CORDEX is  
435 planned to deliver such data (Gutowski Jr. et al., 2016) and will hence allow for an inclusion of RCM-spread in future assessments. It will also facilitate similar assessment for other world regions as spatial extent will be expanded.

## Contributions

440 Ja. W. performed the simulations, analyzed the data, produced all figures and wrote most of the manuscript. D. W. conceived and supervised the research and contributed to the writing, in particular regarding the electricity system. M.R. supplied the CWT analysis and wrote parts of the CWT chapter. All authors contributed ideas, gave feedback and helped to improve the manuscript.

## Acknowledgements

445 We thank M. Greiner, G. Andresen, S. Kozarcenin, T. Brown, D. Schlachtberger and C. Ball for stimulating discussions. We owe J. Brugger gratitude for checking the final manuscript. We also acknowledge the World Climate Research Programme's Working Group on Regional Climate, and the Working Group on Coupled Modelling, former coordinating body of CORDEX and responsible panel for CMIP5. We thank the climate modelling groups for producing and making available their  
450 model output. We acknowledge the Earth System Grid Federation infrastructure an international effort led by the U.S. Department of Energy's Program for Climate Model Diagnosis and Inter-comparison, the European Network for Earth System Modelling and other partners in the Global Organisation for Earth System Science Portals (GO-ESSP). The authors gratefully acknowledge the computing time granted by the JARA-HPC Vergabegremium on the supercomputer JURECA  
455 (Juelich Supercomputing Centre, 2016) at Forschungszentrum Jülich. We gratefully acknowledge support from the Helmholtz Association (via the joint initiative "Energy System 2050 - A Contribution of the Research Field Energy" and the grant no. VH-NG-1025 to D. W.).

## References

- Anderson, K. and Peters, G.: The trouble with negative emissions, *Science*, 354, 182–183, <http://science.sciencemag.org/content/354/6309/182.short>, 2016.
- 460 Auffhammer, M., Baylis, P., and Hausman, C. H.: Climate change is projected to have severe impacts on the frequency and intensity of peak electricity demand across the United States, *Proceedings of the National Academy of Sciences*, 114, 1886–1891, doi:10.1073/pnas.1613193114, <http://www.pnas.org/lookup/doi/10.1073/pnas.1613193114>, 2017.
- 465 Battaglini, A., Komendantova, N., Brtnik, P., and Patt, A.: Perception of barriers for expansion of electricity grids in the European Union, *Energy Policy*, 47, 254–259, doi:10.1016/j.enpol.2012.04.065, <http://linkinghub.elsevier.com/retrieve/pii/S0301421512003709>, 2012.
- Becker, S., Rodriguez, R., Andresen, G., Schramm, S., and Greiner, M.: Transmission grid extensions during the build-up of a fully renewable pan-European electricity supply, *Energy*, 64, 404–418, doi:10.1016/j.energy.2013.10.010, <http://linkinghub.elsevier.com/retrieve/pii/S0360544213008438>, 2014.
- 470 Bloomfield, H. C., Brayshaw, D. J., Shaffrey, L. C., Coker, P. J., and Thornton, H. E.: Quantifying the increasing sensitivity of power systems to climate variability, *Environmental Research Letters*, 11, 124 025, doi:10.1088/1748-9326/11/12/124025, <http://stacks.iop.org/1748-9326/11/i=12/a=124025?key=crossref.be7b8a57ca6e72c9817ec8df7975db1b>, 2016.
- 475 Brown, T., Schierhorn, P.-P., Troester, E., and Ackermann, T.: Optimising the European transmission system for 77% renewable electricity by 2030, *IET Renewable Power Generation*, 10, 3–9, doi:10.1049/iet-rpg.2015.0135, <http://digital-library.theiet.org/content/journals/10.1049/iet-rpg.2015.0135>, 2016.
- Bruckner, T., Bashmarkov, I., and Mulugetta, Y.: Energy Systems, in: *Climate Change 2014: Mitigation of Climate Change. Contribution of Working Group III to the Fifth Assessment Report of the Intergovernmental Panel on Climate Change*, Cambridge University Press, Cambridge, United Kingdom and New York, NY, USA, 2014.
- 480 Chiacchio, M., Solmon, F., Giorgi, F., Stackhouse, P., and Wild, M.: Evaluation of the radiation budget with a regional climate model over Europe and inspection of dimming and brightening: Evaluation of the radiation budget, *Journal of Geophysical Research: Atmospheres*, 120, 1951–1971, doi:10.1002/2014JD022497, <http://doi.wiley.com/10.1002/2014JD022497>, 2015.
- 485 Coumou, D., Lehmann, J., and Beckmann, J.: The weakening summer circulation in the Northern Hemisphere mid-latitudes, *Science*, 348, 324–327, <http://science.sciencemag.org/content/348/6232/324.short>, 2015.
- Crook, J. A., Jones, L. A., Forster, P. M., and Crook, R.: Climate change impacts on future photovoltaic and concentrated solar power energy output, *Energy & Environmental Science*, 4, 3101, doi:10.1039/c1ee01495a, <http://xlink.rsc.org/?DOI=c1ee01495a>, 2011.
- 490 Davis, S. J., Caldeira, K., and Matthews, H. D.: Future CO<sub>2</sub> Emissions and Climate Change from Existing Energy Infrastructure, *Science*, 329, 1330–1333, doi:10.1126/science.1194210, 2010.
- Ely, C. R., Brayshaw, D. J., Methven, J., Cox, J., and Pearce, O.: Implications of the North Atlantic Oscillation for a UK-Norway Renewable power system, *Energy Policy*, 62, 1420–1427, doi:10.1016/j.enpol.2013.06.037, <http://linkinghub.elsevier.com/retrieve/pii/S0301421513005223>, 2013.
- 495

- European Network of Transmission System Operators for Electricity, .: Indicative values for Net Transfer Capacities (NTC) in Continental Europe - Winter 2010/11, working day, peak hours (non-binding values), [https://www.entsoe.eu/fileadmin/user\\_upload/\\_library/ntc/archive/NTC-Values-Winter-2010-2011.pdf](https://www.entsoe.eu/fileadmin/user_upload/_library/ntc/archive/NTC-Values-Winter-2010-2011.pdf), 2011.
- European Network of Transmission System Operators for Electricity, .: Hourly load values for all countries for a specific month (in MW), <https://www.entsoe.eu/db-query/consumption/mh1v-all-countries-for-a-specific-month>, 2015.
- 500
- Farneti, R.: Modelling interdecadal climate variability and the role of the ocean, *Wiley Interdisciplinary Reviews: Climate Change*, 8, e441, doi:10.1002/wcc.441, <http://doi.wiley.com/10.1002/wcc.441>, 2017.
- Gonzalez Aparicio, I., Zucker, A., Careri, F., Monforti, F., Huld, T., and Badger, J.: EMHIREs dataset; Part 1: Wind power generation, Tech. Rep. EUR 28171 EN, Joint Research Center, 2016.
- 505
- Grams, C. M., Beerli, R., Pfenninger, S., Staffell, I., and Wernli, H.: Balancing Europe's wind power output through spatial deployment informed by weather regimes, *Nature Climate Change*, doi:10.1038/nclimate3338, <http://www.nature.com/doi/10.1038/nclimate3338>, 2017.
- Gutowski Jr., W. J., Giorgi, F., Timbal, B., Frigon, A., Jacob, D., Kang, H.-S., Raghavan, K., Lee, B., Lennard, C., Nikulin, G., O&apos;Rourke, E., Rixen, M., Solman, S., Stephenson, T., and Tangang, F.: WCRP COordinated Regional Downscaling EXperiment (CORDEX): a diagnostic MIP for CMIP6, *Geoscientific Model Development*, 9, 4087–4095, doi:10.5194/gmd-9-4087-2016, <http://www.geosci-model-dev.net/9/4087/2016/>, 2016.
- 510
- Haarsma, R. J., Selden, F., and van Oldenborgh, G. J.: Anthropogenic changes of the thermal and zonal flow structure over Western Europe and Eastern North Atlantic in CMIP3 and CMIP5 models, *Climate Dynamics*, 41, 2577–2588, doi:10.1007/s00382-013-1734-8, <http://link.springer.com/10.1007/s00382-013-1734-8>, 2013.
- 515
- Haekkinen, S., Rhines, P. B., and Worthen, D. L.: Atmospheric Blocking and Atlantic Multidecadal Ocean Variability, *Science*, 334, 655–659, <http://www.sciencemag.org/cgi/doi/10.1126/science.1210288>, 2011.
- 520
- Hagspiel, S., Jaegemann, C., Lindenberger, D., Brown, T., Cherevatskiy, S., and Troester, E.: Cost-optimal power system extension under flow-based market coupling, *Energy*, 66, 654–666, doi:10.1016/j.energy.2014.01.025, <http://linkinghub.elsevier.com/retrieve/pii/S0360544214000322>, 2014.
- Hawkins, E. and Sutton, R.: The potential to narrow uncertainty in regional climate predictions, *Bulletin of the American Meteorological Society*, 2009.
- 525
- Hawkins, E., Smith, R. S., Gregory, J. M., and Stainforth, D. A.: Irreducible uncertainty in near-term climate projections, *Climate Dynamics*, 46, 3807–3819, doi:10.1007/s00382-015-2806-8, <http://link.springer.com/10.1007/s00382-015-2806-8>, 2016.
- Herwehe, J. A., Alapaty, K., Spero, T. L., and Nolte, C. G.: Increasing the credibility of regional climate simulations by introducing subgrid-scale cloud-radiation interactions, *Journal of Geophysical Research: Atmospheres*, 119, 5317–5330, doi:10.1002/2014JD021504, <http://doi.wiley.com/10.1002/2014JD021504>, 2014.
- 530
- Huber, M., Dimkova, D., and Hamacher, T.: Integration of wind and solar power in Europe: Assessment of flexibility requirements, *Energy*, 69, 236–246, doi:10.1016/j.energy.2014.02.109, <http://linkinghub.elsevier.com/retrieve/pii/S0360544214002680>, 2014.
- 535
- Jacob, D., Petersen, J., Eggert, B., Alias, A., Christensen, O. B., Bouwer, L. M., Braun, A., Colette, A., Déqué, M., Georgievski, G., Georgopoulou, E., Gobiet, A., Menut, L., Nikulin, G., Haensler, A., Hempelmann,

- N., Jones, C., Keuler, K., Kovats, S., Kröner, N., Kotlarski, S., Kriegsmann, A., Martin, E., van Meijgaard, E., Moseley, C., Pfeifer, S., Preuschmann, S., Radermacher, C., Radtke, K., Rechid, D., Rounsevell, M., Samuelsson, P., Somot, S., Soussana, J.-F., Teichmann, C., Valentini, R., Vautard, R., Weber, B., and Yiou, P.: EURO-CORDEX: new high-resolution climate change projections for European impact research, *Regional Environmental Change*, 14, 563–578, doi:10.1007/s10113-013-0499-2, <http://link.springer.com/10.1007/s10113-013-0499-2>, 2014.
- 540
- James, R., Washington, R., Schleussner, C.-F., Rogelj, J., and Conway, D.: Characterizing half-a-degree difference: a review of methods for identifying regional climate responses to global warming targets: Characterizing half-a-degree difference, *Wiley Interdisciplinary Reviews: Climate Change*, 8, e457, doi:10.1002/wcc.457, <http://doi.wiley.com/10.1002/wcc.457>, 2017.
- 545
- Jerez, S., Tobin, I., Vautard, R., Montávez, J. P., López-Romero, J. M., Thais, F., Bartok, B., Christensen, O. B., Colette, A., Déqué, M., Nikulin, G., Kotlarski, S., van Meijgaard, E., Teichmann, C., and Wild, M.: The impact of climate change on photovoltaic power generation in Europe, *Nature Communications*, 6, 10014, doi:10.1038/ncomms10014, <http://www.nature.com/doi/10.1038/ncomms10014>, 2015.
- 550
- Jones, P. D., Hulme, M., and Briffa, K. R.: A comparison of Lamb circulation types with an objective classification scheme, *International Journal of Climatology*, 13, 655–663, <http://onlinelibrary.wiley.com/doi/10.1002/joc.3370130606/full>, 1993.
- Juelich Supercomputing Centre: JURECA: General-purpose supercomputer at Juelich Supercomputing Centre, *Journal of large-scale research facilities*, 2, doi:10.17815/jlsrf-2-121, <http://dx.doi.org/10.17815/jlsrf-2-121>, 2016.
- 555
- Knutti, R., Masson, D., and Gettelman, A.: Climate model genealogy: Generation CMIP5 and how we got there, *Geophysical Research Letters*, 40, 1194–1199, doi:10.1002/grl.50256, <http://doi.wiley.com/10.1002/grl.50256>, 2013.
- Mastrandrea, M. D., Field, C. B., Stocker, T. F., Edenhofer, O., Ebi, K. L., Frame, D. J., Held, H., Kriegler, E., Mach, K. J., Matschoss, P. R., and others: Guidance note for lead authors of the IPCC fifth assessment report on consistent treatment of uncertainties, <http://pubman.mpdl.mpg.de/pubman/item/escidoc:2147184/component/escidoc:2147185/uncertainty-guidance-note.pdf>, 2010.
- 560
- Moemken, J., Reyers, M., Buldmann, B., and Pinto, J. G.: Decadal predictability of regional scale wind speed and wind energy potentials over Central Europe, *Tellus A: Dynamic Meteorology and Oceanography*, 68, 29199, doi:10.3402/tellusa.v68.29199, <https://www.tandfonline.com/doi/full/10.3402/tellusa.v68.29199>, 2016.
- 565
- Monforti, F., Gaetani, M., and Vignati, E.: How synchronous is wind energy production among European countries?, *Renewable and Sustainable Energy Reviews*, 59, 1622–1638, doi:10.1016/j.rser.2015.12.318, <http://linkinghub.elsevier.com/retrieve/pii/S1364032115017013>, 2016.
- 570
- Peings, Y. and Magnusdottir, G.: Forcing of the wintertime atmospheric circulation by the multi-decadal fluctuations of the North Atlantic ocean, *Environmental Research Letters*, 9, 034018, doi:10.1088/1748-9326/9/3/034018, <http://stacks.iop.org/1748-9326/9/i=3/a=034018?key=crossref.78c09fa6ee45935be9d64175d1959d01>, 2014.

- Pfenninger, S. and Staffell, I.: Long-term patterns of European PV output using 30 years of validated hourly reanalysis and satellite data, *Energy*, 114, 1251–1265, doi:10.1016/j.energy.2016.08.060, <http://linkinghub.elsevier.com/retrieve/pii/S0360544216311744>, 2016.
- Pfenninger, S., Gauché, P., Lilliestam, J., Damerau, K., Wagner, F., and Patt, A.: Potential for concentrating solar power to provide baseload and dispatchable power, *Nature Climate Change*, 4, 689–692, doi:10.1038/nclimate2276, <http://www.nature.com/doi/10.1038/nclimate2276>, 2014.
- 580 Rasmussen, M. G., Andresen, G. B., and Greiner, M.: Storage and balancing synergies in a fully or highly renewable pan-European power system, *Energy Policy*, 51, 642–651, doi:10.1016/j.enpol.2012.09.009, <http://linkinghub.elsevier.com/retrieve/pii/S0301421512007677>, 2012.
- Reyers, M., Pinto, J. G., and Moemken, J.: Statistical-dynamical downscaling for wind energy potentials: evaluation and applications to decadal hindcasts and climate change projections, *International Journal of Climatology*, 35, 229–244, doi:10.1002/joc.3975, <http://doi.wiley.com/10.1002/joc.3975>, 2015.
- 585 Reyers, M., Moemken, J., and Pinto, J. G.: Future changes of wind energy potentials over Europe in a large CMIP5 multi-model ensemble, *International Journal of Climatology*, 36, 783–796, doi:10.1002/joc.4382, <http://doi.wiley.com/10.1002/joc.4382>, 2016.
- Rodriguez, R. A., Becker, S., Andresen, G. B., Heide, D., and Greiner, M.: Transmission needs across a fully renewable European power system, *Renewable Energy*, 63, 467–476, doi:10.1016/j.renene.2013.10.005, <http://linkinghub.elsevier.com/retrieve/pii/S0960148113005351>, 2014.
- 590 Rodriguez, R. A., Becker, S., and Greiner, M.: Cost-optimal design of a simplified, highly renewable pan-European electricity system, *Energy*, 83, 658–668, doi:10.1016/j.energy.2015.02.066, <http://linkinghub.elsevier.com/retrieve/pii/S0360544215002212>, 2015a.
- 595 Rodriguez, R. A., Dahl, M., Becker, S., and Greiner, M.: Localized vs. synchronized exports across a highly renewable pan-European transmission network, *Energy, Sustainability and Society*, 5, doi:10.1186/s13705-015-0048-6, <http://energysustainsoc.springeropen.com/articles/10.1186/s13705-015-0048-6>, 2015b.
- Rogelj, J., Luderer, G., Pietzcker, R. C., Kriegler, E., Schaeffer, M., Krey, V., and Riahi, K.: Energy system transformations for limiting end-of-century warming to below 1.5 degree C, *Nature Climate Change*, 5, 519–527, doi:10.1038/nclimate2572, <http://www.nature.com/doi/10.1038/nclimate2572>, 2015.
- 600 Rogelj, J., den Elzen, M., Hoehne, N., Fransen, T., Fekete, H., Winkler, H., Schaeffer, R., Sha, F., Riahi, K., and Meinshausen, M.: Paris Agreement climate proposals need a boost to keep warming well below 2 degree C, *Nature*, 534, 631–639, doi:10.1038/nature18307, <http://www.nature.com/doi/10.1038/nature18307>, 2016.
- 605 Rummukainen, M.: Added value in regional climate modeling, *Wiley Interdisciplinary Reviews: Climate Change*, 7, 145–159, doi:10.1002/wcc.378, <http://doi.wiley.com/10.1002/wcc.378>, 2016.
- Schlachtberger, D., Becker, S., Schramm, S., and Greiner, M.: Backup flexibility classes in emerging large-scale renewable electricity systems, *Energy Conversion and Management*, 125, 336–346, doi:10.1016/j.enconman.2016.04.020, <http://linkinghub.elsevier.com/retrieve/pii/S0196890416302606>, 2016.
- 610 Schlachtberger, D., Brown, T., Schramm, S., and Greiner, M.: The benefits of cooperation in a highly renewable European electricity network, *Energy*, 134, 469–481, doi:10.1016/j.energy.2017.06.004, <http://linkinghub.elsevier.com/retrieve/pii/S0360544217309969>, 2017.

- Schleussner, C.-F., Lissner, T. K., Fischer, E. M., Wohland, J., Perrette, M., Golly, A., Rogelj, J., Childers, K.,  
615 Schewe, J., Frieler, K., Mengel, M., Hare, W., and Schaeffer, M.: Differential climate impacts for policy-  
relevant limits to global warming: the case of 1.5 degree C and 2 degree C, *Earth System Dynamics*, 7,  
327–351, doi:10.5194/esd-7-327-2016, <http://www.earth-syst-dynam.net/7/327/2016/>, 2016a.
- Schleussner, C.-F., Rogelj, J., Schaeffer, M., Lissner, T., Licker, R., Fischer, E. M., Knutti, R., Levermann,  
A., Frieler, K., and Hare, W.: Science and policy characteristics of the Paris Agreement temperature goal,  
620 *Nature Climate Change*, 6, 827–835, doi:10.1038/nclimate3096, <http://www.nature.com/doi/10.1038/nclimate3096>, 2016b.
- Staffell, I. and Pfenninger, S.: Using bias-corrected reanalysis to simulate current and future wind power out-  
put, *Energy*, 114, 1224–1239, doi:10.1016/j.energy.2016.08.068, <http://linkinghub.elsevier.com/retrieve/pii/S0360544216311811>, 2016.
- 625 Stocker, T. F., Qin, D., Plattner, G.-K., Alexander, L. V., Allen, S. K., Bindoff, N. L., Bréon, F.-M., Church, J. A.,  
Cubasch, U., Emori, S., and others: Technical summary, in: *Climate Change 2013: The Physical Science Basis. Contribution of Working Group I to the Fifth Assessment Report of the Intergovernmental Panel on Climate Change*, pp. 33–115, Cambridge University Press, [http://pubman.mpdl.mpg.de/pubman/item/escidoc:1977530/component/escidoc:1977527/WG1AR5\\_TS\\_FINAL.pdf](http://pubman.mpdl.mpg.de/pubman/item/escidoc:1977530/component/escidoc:1977527/WG1AR5_TS_FINAL.pdf), 2013.
- 630 Strandberg, G., Barring, L., Hansson, U., Jansson, C., Jones, C., Kjellström, E., Kolax, M., Kupiainen, M.,  
Nikulin, G., Samuelsson, P., and others: CORDEX scenarios for Europe from the Rossby Centre regional  
climate model RCA4, SMHI, Sveriges Meteorologiska och Hydrologiska institut, 2015.
- Taylor, K. E., Stouffer, R. J., and Meehl, G. A.: An Overview of CMIP5 and the Experiment Design, *Bulletin  
of the American Meteorological Society*, pp. 485–498, 2011.
- 635 Tobin, I., Vautard, R., Balog, I., Bréon, F.-M., Jerez, S., Ruti, P. M., Thais, F., Vrac, M., and Yiou, P.: As-  
sessing climate change impacts on European wind energy from ENSEMBLES high-resolution climate pro-  
jections, *Climatic Change*, 128, 99–112, doi:10.1007/s10584-014-1291-0, <http://link.springer.com/10.1007/s10584-014-1291-0>, 2015.
- Tobin, I., Jerez, S., Vautard, R., Thais, F., van Meijgaard, E., Prein, A., Deque, M., Kotlarski, S.,  
640 Maule, C. F., Nikulin, G., Noel, T., and Teichmann, C.: Climate change impacts on the power gen-  
eration potential of a European mid-century wind farms scenario, *Environmental Research Letters*,  
11, 034013, doi:10.1088/1748-9326/11/3/034013, <http://stacks.iop.org/1748-9326/11/i=3/a=034013?key=crossref.7da88a5a7c6dea354ce58294e3c7482b>, 2016.
- Trump, D. J.: Presidential Executive Order on Promoting Energy Independence  
645 and Economic Growth, <https://www.whitehouse.gov/the-press-office/2017/03/28/presidential-executive-order-promoting-energy-independence-and-economi-1>, 2017.
- UNFCCC: Adoption of the Paris Agreement, FCCC/CP/2015/10/Add.1, 2015.
- van Vliet, M. T. H., Yearsley, J. R., Ludwig, F., Voegelé, S., Lettenmaier, D. P., and Kabat, P.: Vulner-  
ability of US and European electricity supply to climate change, *Nature Climate Change*, 2, 676–681,  
650 doi:10.1038/nclimate1546, <http://www.nature.com/doi/10.1038/nclimate1546>, 2012.
- van Vliet, M. T. H., Wiberg, D., Leduc, S., and Riahi, K.: Power-generation system vulnerability and adaptation  
to changes in climate and water resources, *Nature Climate Change*, 6, 375–380, doi:10.1038/nclimate2903,  
<http://www.nature.com/doi/10.1038/nclimate2903>, 2016.

- van Vuuren, D. P., van Soest, H., Riahi, K., Clarke, L., Krey, V., Kriegler, E., Rogelj, J., Schaeffer,  
655 M., and Tavoni, M.: Carbon budgets and energy transition pathways, *Environmental Research Letters*,  
11, 075 002, doi:10.1088/1748-9326/11/7/075002, [http://stacks.iop.org/1748-9326/11/i=7/a=075002?key=  
crossref.2d4497e6c5ce898dd4f0b4d3a29132a1](http://stacks.iop.org/1748-9326/11/i=7/a=075002?key=crossref.2d4497e6c5ce898dd4f0b4d3a29132a1), 2016.
- Vautard, R., Thais, F., Tobin, I., Bréon, F.-M., de Lavergne, J.-G. D., Colette, A., Yiou, P., and Ruti, P. M.:  
660 Regional climate model simulations indicate limited climatic impacts by operational and planned Euro-  
pean wind farms, *Nature Communications*, 5, doi:10.1038/ncomms4196, [http://www.nature.com/doifinder/  
10.1038/ncomms4196](http://www.nature.com/doifinder/10.1038/ncomms4196), 2014.
- Weber, J., Wohland, J., Reyers, M., Moemken, J., Hoppe, C., Pinto, J. G., and Witthaut, D.: Impact of climate  
change on backup and storage needs in a wind-dominated European power system, in review, 2017.
- Wiser, R., Bolinger, M., Barbose, G., Darghouth, N., Hoen, B., Mills, A., Rand, J., Millstein, D., Porter,  
665 K., and Widiss, R.: 2015 Wind Technologies Market Report, [https://pubarchive.lbl.gov/islandora/object/ir%  
3A1005951/datastream/PDF/download/citation.pdf](https://pubarchive.lbl.gov/islandora/object/ir%3A1005951/datastream/PDF/download/citation.pdf), 2016.



## Supplementary Material

### A) Detailed methodology

Adopting the approach of Tobin et al. (2016), we use near-surface wind speeds 10 meters above the  
670 ground. Assuming a power-law relationship for the vertical wind profile, the velocity at hub height  
 $H$  is obtained as

$$v_H = v_{10m} \cdot \left( \frac{H}{10} \right)^{\frac{1}{7}} \quad (11)$$

and we chose  $H = 80m$ .

The conversion of wind speeds into renewable generation is performed using a simple power curve

$$675 \quad P(v_H) = P_0 \begin{cases} 0, & \text{if } v_H < v_i \text{ or } v_H > v_0 \\ \frac{v_H^3 - v_i^3}{v_R^3 - v_i^3}, & \text{if } v_i \leq v_H < v_R \\ 1, & \text{if } v_R \leq v_H < v_0 \end{cases} \quad (12)$$

where  $v_H$  denotes wind velocity at hub height and  $v_i = 3.5$  m/s,  $v_R = 12$  m/s,  $v_0 = 25$  m/s  
denote the cut-in, rated and cut-out velocity of the wind turbine, respectively. We assume that every  
wind park has a capacity  $P_0 = 0.1$  GW.

If the number of wind parks per grid cell  $N_{\text{wind}}(x, y)$  is known, the renewable generation in a  
680 country with area  $A_i$  is given by

$$P_i(t) = \sum_{x, y \in A_i} N_{\text{wind}}(x, y) \cdot P(v_H(x, y, t)). \quad (13)$$

Note that we assume a stationary configuration of wind parks throughout every 20 year period.  
Moreover, we assume that each country generates as much energy from renewables as is needed in  
a 20 year period ranging from  $t_{\text{start}}$  to  $t_{\text{end}}$

$$685 \quad \int_{t_{\text{start}}}^{t_{\text{end}}} P_i(t) dt = \int_{t_{\text{start}}}^{t_{\text{end}}} D_i(t) dt \quad (14)$$

Since all variables except from  $N_{\text{wind}}$  are used as input to the model, and hence are known, equa-  
tions (13) and (14) can be used to determine  $N_{\text{wind}}$ . However, the solution is degenerate. In order to  
single out one solution, we adopt the strategy of Monforti et al. (2016) who distribute wind parks  
randomly at those places where the temporal average of renewable generation  $P$  is above average.  
690 Performing a Monte Carlo analysis for the deployment of wind parks, Monforti et al. found that  
the sensitivity of this partially random allocation procedure to changes in the actual configuration of  
 $N_{\text{wind}}$  is small.

## Transmission

The imports/exports  $F_i$  of a country  $i$  (see Eq. (2)) depend on the incidence matrix

$$695 \quad K_{i,l} = \begin{cases} 1, & \text{if line } l \text{ starts in country } i \\ -1 & \text{if line } l \text{ ends in country } i \\ 0 & \text{otherwise} \end{cases} \quad (15)$$

and the flows  $\hat{F}_l$  along a line  $l$

$$F_i = - \sum_l K_{i,l} \hat{F}_l, \quad (16)$$

where the minus sign stems from the (arbitrary) choice that  $F_i > 0$  means imports. The flow along a line  $l$  is bound by

$$700 \quad \alpha \cdot \text{NTC}_{l-} \leq \hat{F}_l \leq \alpha \cdot \text{NTC}_{l+}, \quad (17)$$

where  $\alpha$  denotes grid expansion. The line limits  $\text{NTC}_{l+} \geq 0$  and  $\text{NTC}_{l-} \leq 0$  are direction dependent and the former refers to the line limit in the direction of line  $l$  as defined via the incidence matrix (15). Line limits are directional winter Net Transfer Capacities published by ENTSO-E for 2010/2011 (European Network of Transmission System Operators for Electricity, 2011).

## 705 Inclusion of PV generation

We use PV generation timeseries from Pfenninger and Staffell (2016) which is more complete than other open source datasets like Open Power System Data<sup>1</sup>. The data set is bias corrected and validated at around 1000 locations. We favored to use the part of the dataset which is based on MERRA over SARAH because the latter is lacking data in the first years.

710 We average over 30 years of data to compute a representative PV generation timeseris  $PV_i(t)$  for every country  $i$ . Using a representative year is not an ideal approach since inter-year variations are artificially muted. However, the PV generation timeseries only exists for the historical period. If one was to combine PV generations from one year with wind generations from another, the result is likely to be unrealistic because the corresponding state of the climate system belonging to either the  
715 PV or wind generation would be out of phase. We thus consider our approach to be the most suitable one in this assessment.

In order to incorporate PV generation into the model, we replace the original load  $D_i(t)$  in Eq. (1) with the residual load after PV generation is subtracted as

<sup>1</sup> <http://www.open-power-system-data.org/>

$$D_i(t) \rightarrow D_i(t) - \gamma \cdot PV_i(t), \quad (18)$$

720 where  $\gamma$  is chosen such that 29% of the overall generation is contributed by PV. This share has been found to be the European optimum in terms of minimizing backup **needs energy** in a similar setup (Rodriguez et al., 2014). The load  $D_i(t)$  now represents the residual load which has to be satisfied by wind, im-/exports or dispatchable power plants. Results including PV are shown in Supplement B.

### 725 **Sensitivity to load timeseries**

We repeat our analysis assuming constant loads

$$D_i(t) \rightarrow \langle \hat{D}_i(t) \rangle_t, \quad (19)$$

where  $\hat{D}_i(t)$  denotes monthly load data from ENTSO-E and  $\langle \cdot \rangle_t$  denotes the temporal average. The goal of muting the time dependency of the load is to test for the influence of the load timeseries on our  
730 modelling outcomes. Results for constant loads are shown in Supplement C.

## B) Energy results including PV

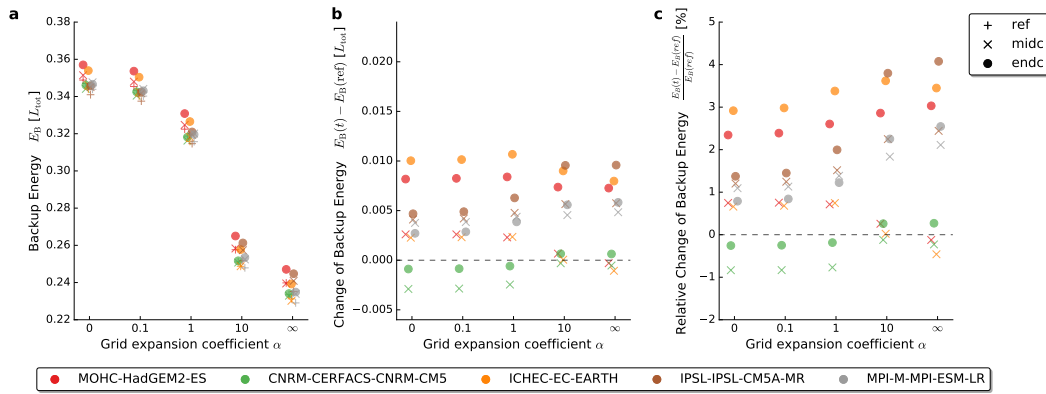

Figure 8. Same as Fig. 2, but including PV from Pfenninger and Staffell (2016).

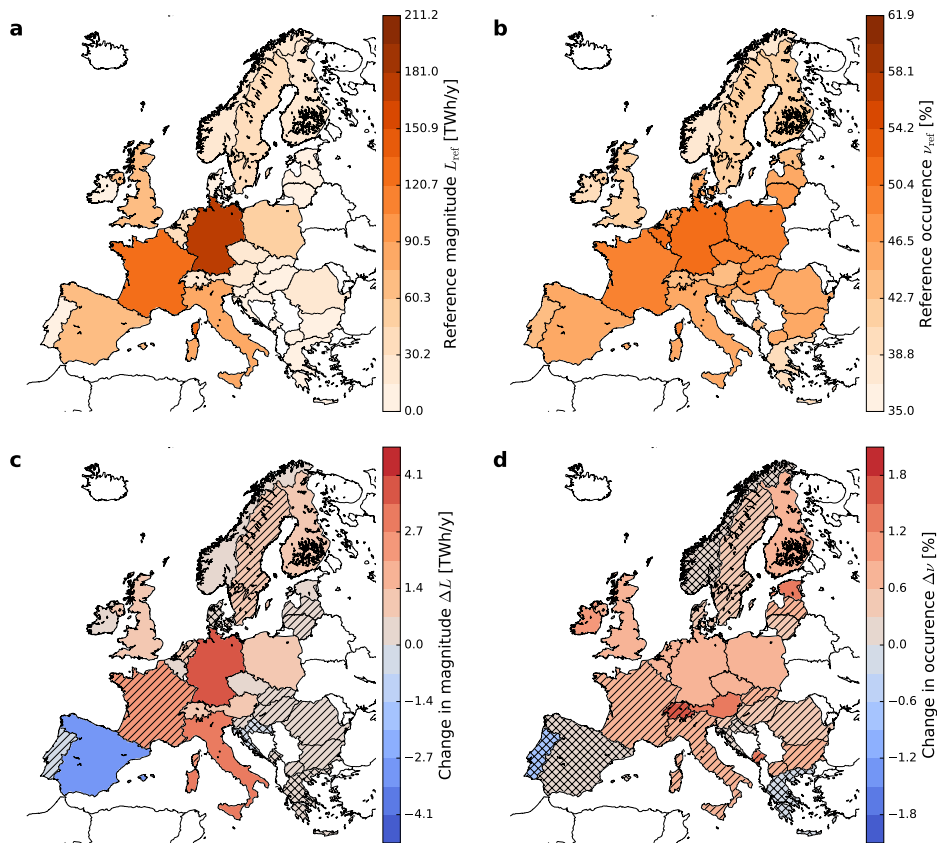

Figure 9. Same as Fig. 3 but including PV from Pfenninger and Staffell (2016).

### C) Energy results assuming constant loads

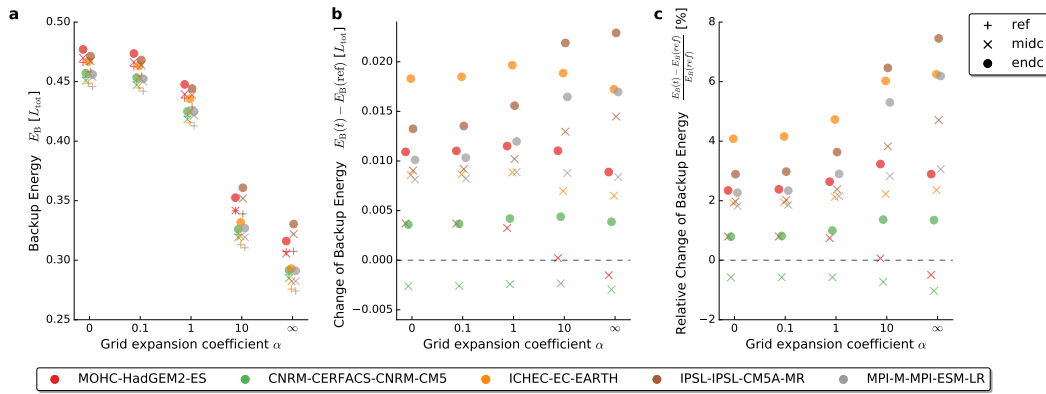

Figure 10. Same as Fig. 2, but with constant load.

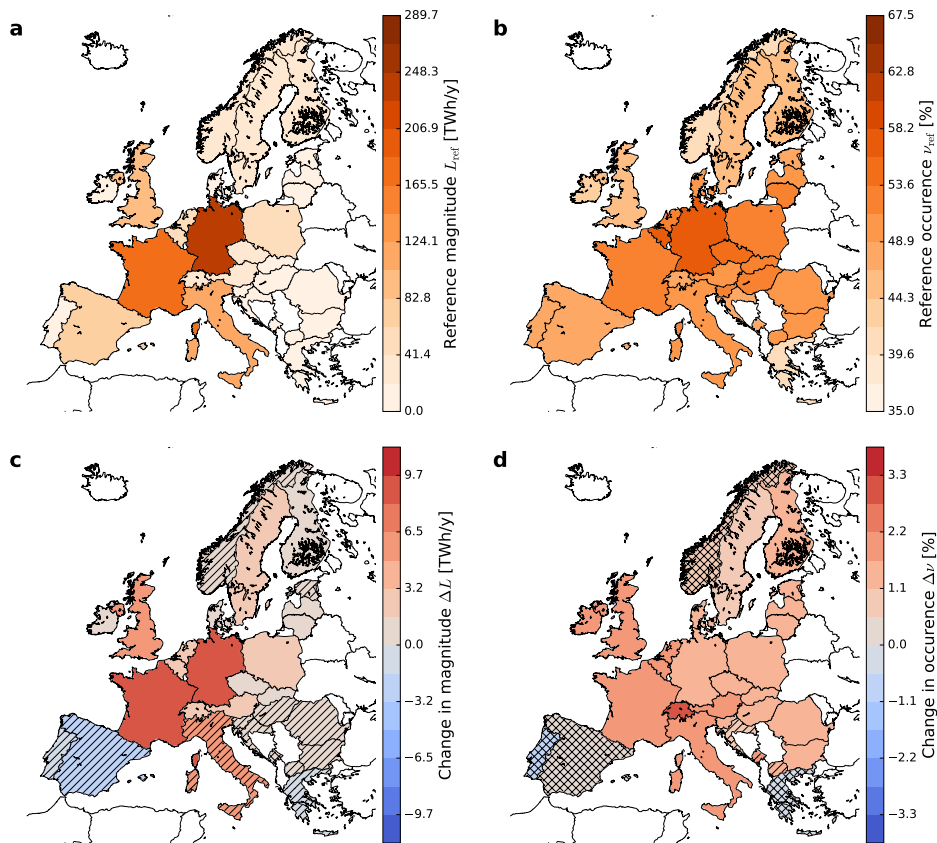

Figure 11. Same as Fig. 3 but assuming constant load.

D) Correlations by mid century

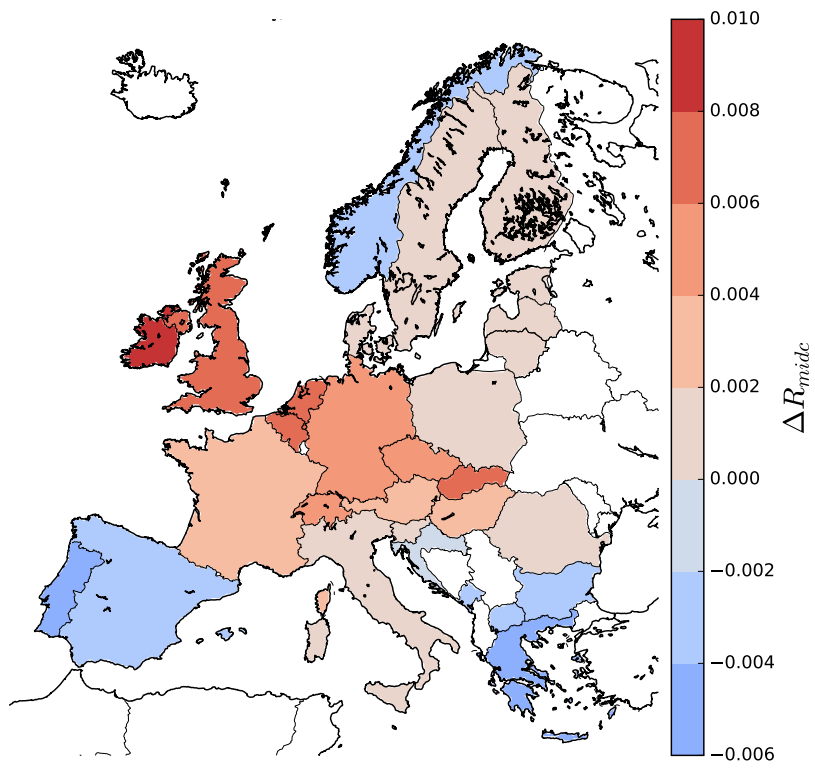

Figure 12. Same as Fig. 4 but for mid century.

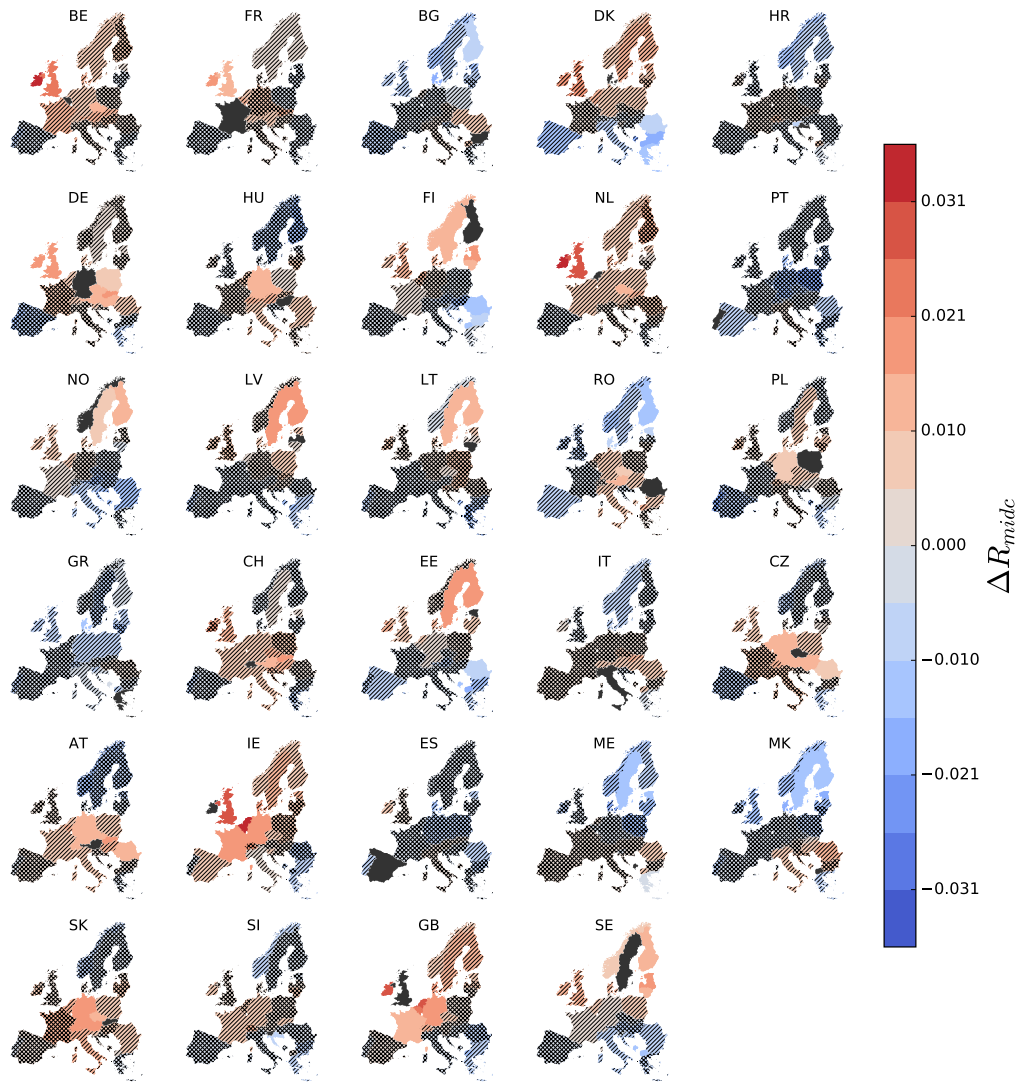

Figure 13. Same as Fig. 5 but for mid century.

## E) Spatial homogeneity and CWTs

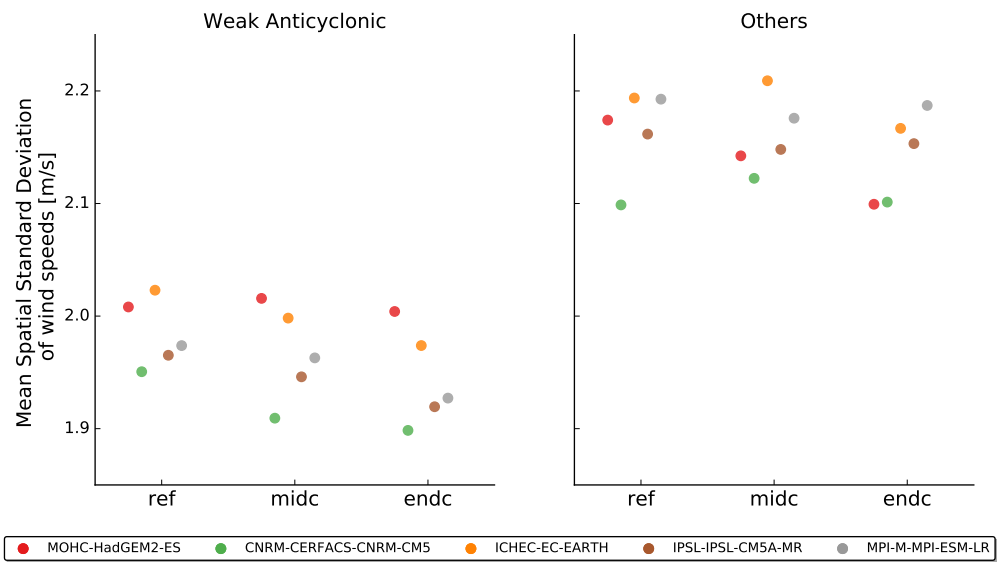

**Figure 14.** Mean spatial standard deviation of wind speeds over all 28 countries considered in the energy assessment. The standard deviation is calculated for each grid point separately. The weak anticyclonic CWT has a distinctly smaller spatial standard deviation than all other situations considered together. Hence, it is characterized by more homogeneous wind fields.



## F) Annual load values on country level

**Table 2.** Annual sums of country electricity consumption based on hourly 2015 data provided by the European Network of Transmission System Operators for Electricity (2015).

| country        | country code | Annual load [TWh] |
|----------------|--------------|-------------------|
| Austria        | AT           | 69.62             |
| Belgium        | BE           | 85.22             |
| Bulgaria       | BG           | 38.62             |
| Switzerland    | CH           | 62.06             |
| Czech Republic | CZ           | 63.53             |
| Germany        | DE           | 505.27            |
| Denmark        | DK           | 33.9              |
| Estonia        | EE           | 7.93              |
| Spain          | ES           | 248.5             |
| Finland        | FI           | 82.5              |
| France         | FR           | 471.26            |
| Great Britain  | GB           | 282.19            |
| Greece         | GR           | 51.4              |
| Croatia        | HR           | 17.19             |
| Hungary        | HU           | 40.75             |
| Ireland        | IE           | 26.57             |
| Italy          | IT           | 314.35            |
| Lithuania      | LT           | 10.86             |
| Latvia         | LV           | 7.07              |
| Montenegro     | ME           | 3.42              |
| Macedonia      | MK           | 7.84              |
| Netherlands    | NL           | 113.25            |
| Norway         | NO           | 128.65            |
| Poland         | PL           | 149.96            |
| Portugal       | PT           | 48.93             |
| Romania        | RO           | 52.31             |
| Sweden         | SE           | 135.93            |
| Slovenia       | SI           | 13.65             |
| Slovakia       | SK           | 28.21             |
| Total          |              | 3100.94           |
